# Supplementary material for: MCU promotes oxidative stress by regulating SIRT3 to destroy the pancreatic duct epithelial cytoskeleton: In vivo and in vitro hypertriglyceridema-induced pancreatitis
Source: Research Square preprint supplement (doi:10.21203/rs.3.rs-6249694/v1), 2025-03-28
Supplement: Supplementary file 1 [file 9dbc569db9057b2632268fb7.xlsx]

## Sheet: 1234动物内参5678MCU
WB results
Animal experiments of MCU WB	Area		animal	COX IV	MCU	MCU/COX IV					Control	HTG	AP	HTGP
1	29936.1		Control	29936.1	16040.9	0.535837		0.535837			0.535837	0.360121	0.771192	0.915543
2	40878.2		HTG	40878.2	14721.1	0.360121		0.360121			0.422079	0.515505	0.819807	0.915156
3	41416.9		AP	41416.9	31940.4	0.771192		0.771192			0.507836	0.52642	0.761061	0.88375
4	40016.8		HTGP	40016.8	36637.1	0.915543		0.915543
5	16040.9
6	14721.1
7	31940.4
8	36637.1
Statistical analysis results from Graphpad Prism8
	AP VS HTGP				C VS AP				C VS HTG				C VS HTGP			HTG VS HTGP
	表进行了分析︰	数据 1			表进行了分析︰	数据 1			表进行了分析︰	数据 1			表进行了分析︰	数据 1		表进行了分析︰	数据 1
	列 D	TG+CAE			列 C	CAE			列 B	TG			列 D	TG+CAE		列 D	TG+CAE
	vs.	vs.			vs.	vs.			vs.	vs.			vs.	vs.		vs.	vs.
	列 C	CAE			列 A	Control			列 A	Control			列 A	Control		列 B	TG
	配对的 t 检验				配对的 t 检验				配对的 t 检验				配对的 t 检验			配对的 t 检验
	P 值︰	0.0444			P 值︰	0.0008			P 值︰	0.5643			P 值︰	0.0022		P 值︰	0.0026
	P 值摘要	*			P 值摘要	***			P 值摘要	ns			P 值摘要	**		P 值摘要	**
	显著不同 (P < 0.05)?	是			显著不同 (P < 0.05)?	是			显著不同 (P < 0.05)?	否			显著不同 (P < 0.05)?	是		显著不同 (P < 0.05)?	是
	One- or two-tailed P value?	双尾			One- or two-tailed P value?	双尾			One- or two-tailed P value?	双尾			One- or two-tailed P value?	双尾		One- or two-tailed P value?	双尾
	t, df	t=2.894, df=4			t, df	t=9.108, df=4			t, df	t=0.6275, df=4			t, df	t=7.022, df=4		t, df	t=6.704, df=4
	差异有多大？				差异有多大？				差异有多大？				差异有多大？			差异有多大？
	Mean of column C	1.071			Mean of column A	0.742			Mean of column A	0.742			Mean of column A	0.742		Mean of column B	0.7559
	Mean of column D	1.333			Mean of column C	1.071			Mean of column B	0.7559			Mean of column D	1.333		Mean of column D	1.333
	Difference between means (D - C) ± SEM	0.2621 ± 0.09059			Difference between means (C - A) ± SEM	0.3286 ± 0.03608			Difference between means (B - A) ± SEM	0.01397 ± 0.02227			Difference between means (D - A) ± SEM	0.5907 ± 0.08413		Difference between means (D - B) ± SEM	0.5768 ± 0.08603
	95% 置信区间:	0.01062 到 0.5137			95% 置信区间:	0.2284 到 0.4288			95% 置信区间:	-0.04785 到 0.07580			95% 置信区间:	0.3572 到 0.8243		95% 置信区间:	0.3379 到 0.8156
	R squared (eta squared)	0.6767			R squared (eta squared)	0.954			R squared (eta squared)	0.08963			R squared (eta squared)	0.925		R squared (eta squared)	0.9183
	F 测试比较差异				F 测试比较差异				F 测试比较差异				F 测试比较差异			F 测试比较差异
	F, DFn, Dfd	5.752, 2, 2			F, DFn, Dfd	14.08, 2, 2			F, DFn, Dfd	4.745, 2, 2			F, DFn, Dfd	80.99, 2, 2		F, DFn, Dfd	17.07, 2, 2
	P 值︰	0.2962			P 值︰	0.1326			P 值︰	0.3481			P 值︰	0.0244		P 值︰	0.1107
	P 值摘要	ns			P 值摘要	ns			P 值摘要	ns			P 值摘要	*		P 值摘要	ns
	显著不同 (P < 0.05)?	否			显著不同 (P < 0.05)?	否			显著不同 (P < 0.05)?	否			显著不同 (P < 0.05)?	是		显著不同 (P < 0.05)?	否
	数据分析...				数据分析...				数据分析...				数据分析...			数据分析...
	样本大小:, column C	3			样本大小:, column A	3			样本大小:, column A	3			样本大小:, column A	3		样本大小:, column B	3
	样本大小:, column D	3			样本大小:, column C	3			样本大小:, column B	3			样本大小:, column D	3		样本大小:, column D	3
cell experiments of MCU WB
	Area			COX IV	MCU	MCU/COX IV				Control	TG	CAE	TG+CAE
	36251.4		Control	36251.4	27504.2	0.758707	0.758707			0.758707	0.796247	1.02899	1.1663
	32256		TG	32256	25683.7	0.796247	0.796247			0.740564	0.732599	1.04287	1.43027
	31475.3		CAE	31475.3	32387.9	1.02899	1.02899			0.726614	0.738964	1.13982	1.40153
	35935.8		TG+CAE	35935.8	41911.8	1.1663	1.1663
	27504.2
	25683.7
	32387.9
	41911.8
Statistical analysis results from Graphpad Prism8
	AP VS HTGP				C VS AP				C VS HTG				C VS HTGP			HTG VS HTGP
	表进行了分析︰	数据 1			表进行了分析︰	数据 1			表进行了分析︰	数据 1			表进行了分析︰	数据 1		表进行了分析︰	数据 1
	列 D	HTGP			列 C	AP			列 B	HTG			列 D	HTGP		列 D	HTGP
	vs.	vs.			vs.	vs.			vs.	vs.			vs.	vs.		vs.	vs.
	列 C	AP			列 A	Control			列 A	Control			列 A	Control		列 B	HTG
	配对的 t 检验				配对的 t 检验				配对的 t 检验				配对的 t 检验			配对的 t 检验
	P 值︰	0.0045			P 值︰	0.0016			P 值︰	0.7555			P 值︰	0.0003		P 值︰	0.0013
	P 值摘要	**			P 值摘要	**			P 值摘要	ns			P 值摘要	***		P 值摘要	**
	显著不同 (P < 0.05)?	是			显著不同 (P < 0.05)?	是			显著不同 (P < 0.05)?	否			显著不同 (P < 0.05)?	是		显著不同 (P < 0.05)?	是
	One- or two-tailed P value?	双尾			One- or two-tailed P value?	双尾			One- or two-tailed P value?	双尾			One- or two-tailed P value?	双尾		One- or two-tailed P value?	双尾
	t, df	t=5.761, df=4			t, df	t=7.629, df=4			t, df	t=0.3335, df=4			t, df	t=11.62, df=4		t, df	t=7.993, df=4
	差异有多大？				差异有多大？				差异有多大？				差异有多大？			差异有多大？
	Mean of column C	0.784			Mean of column A	0.4886			Mean of column A	0.4886			Mean of column A	0.4886		Mean of column B	0.4673
	Mean of column D	0.9048			Mean of column C	0.784			Mean of column B	0.4673			Mean of column D	0.9048		Mean of column D	0.9048
	Difference between means (D - C) ± SEM	0.1208 ± 0.02097			Difference between means (C - A) ± SEM	0.2954 ± 0.03873			Difference between means (B - A) ± SEM	-0.02124 ± 0.06368			Difference between means (D - A) ± SEM	0.4162 ± 0.03581		Difference between means (D - B) ± SEM	0.4375 ± 0.05473
	95% 置信区间:	0.06258 到 0.1790			95% 置信区间:	0.1879 到 0.4030			95% 置信区间:	-0.1980 到 0.1556			95% 置信区间:	0.3168 到 0.5156		95% 置信区间:	0.2855 到 0.5894
	R squared (eta squared)	0.8924			R squared (eta squared)	0.9357			R squared (eta squared)	0.02705			R squared (eta squared)	0.9713		R squared (eta squared)	0.9411
	F 测试比较差异				F 测试比较差异				F 测试比较差异				F 测试比较差异			F 测试比较差异
	F, DFn, Dfd	2.963, 2, 2			F, DFn, Dfd	3.562, 2, 2			F, DFn, Dfd	2.463, 2, 2			F, DFn, Dfd	10.55, 2, 2		F, DFn, Dfd	26.00, 2, 2
	P 值︰	0.5047			P 值︰	0.4384			P 值︰	0.5775			P 值︰	0.1731		P 值︰	0.0741
	P 值摘要	ns			P 值摘要	ns			P 值摘要	ns			P 值摘要	ns		P 值摘要	ns
	显著不同 (P < 0.05)?	否			显著不同 (P < 0.05)?	否			显著不同 (P < 0.05)?	否			显著不同 (P < 0.05)?	否		显著不同 (P < 0.05)?	否
	数据分析...				数据分析...				数据分析...				数据分析...			数据分析...
	样本大小:, column C	3			样本大小:, column A	3			样本大小:, column A	3			样本大小:, column A	3		样本大小:, column B	3
	样本大小:, column D	3			样本大小:, column C	3			样本大小:, column B	3			样本大小:, column D	3		样本大小:, column D	3
Animal experiments of SIRT3 WB
		SIRT3		COX IV		SIRT3/COX IV			Control	HTG	AP	HTGP
	1	127675		106862		1.19477			1.19477	1.026	0.600979	0.205097
	2	149489		145701		1.026			0.926055	1.15153	0.561843	0.253519
	3	89609.6		149106		0.600979			1.27856	1.21531	0.782465	0.211062
	4	24600.4		119945		0.205097
	表进行了分析︰	数据 1		表进行了分析︰	数据 1		表进行了分析︰	数据 1		表进行了分析︰	数据 1	表进行了分析︰	数据 1	表进行了分析︰	数据 1
	列 C	AP		列 D	HTGP		列 C	AP		列 B	HTG	列 D	HTGP	列 D	HTGP
	vs.	vs.		vs.	vs.		vs.	vs.		vs.	vs.	vs.	vs.	vs.	vs.
	列 B	HTG		列 C	AP		列 A	Control		列 A	Control	列 A	Control	列 B	HTG
	配对的 t 检验			配对的 t 检验			配对的 t 检验			配对的 t 检验		配对的 t 检验		配对的 t 检验
	P 值︰	0.0053		P 值︰	0.0036		P 值︰	0.0184		P 值︰	0.9864	P 值︰	0.0011	P 值︰	<0.0001
	P 值摘要	**		P 值摘要	**		P 值摘要	*		P 值摘要	ns	P 值摘要	**	P 值摘要	****
	显著不同 (P < 0.05)?	是		显著不同 (P < 0.05)?	是		显著不同 (P < 0.05)?	是		显著不同 (P < 0.05)?	否	显著不同 (P < 0.05)?	是	显著不同 (P < 0.05)?	是
	One- or two-tailed P value?	双尾		One- or two-tailed P value?	双尾		One- or two-tailed P value?	双尾		One- or two-tailed P value?	双尾	One- or two-tailed P value?	双尾	One- or two-tailed P value?	双尾
	t, df	t=5.495, df=4		t, df	t=6.105, df=4		t, df	t=3.841, df=4		t, df	t=0.01819, df=4	t, df	t=8.471, df=4	t, df	t=15.74, df=4
	差异有多大？			差异有多大？			差异有多大？			差异有多大？		差异有多大？		差异有多大？
	Mean of column B	1.131		Mean of column C	0.6484		Mean of column A	1.133		Mean of column A	1.133	Mean of column A	1.133	Mean of column B	1.131
	Mean of column C	0.6484		Mean of column D	0.2232		Mean of column C	0.6484		Mean of column B	1.131	Mean of column D	0.2232	Mean of column D	0.2232
	Difference between means (C - B) ± SEM	-0.4825 ± 0.08782		Difference between means (D - C) ± SEM	-0.4252 ± 0.06965		Difference between means (C - A) ± SEM	-0.4847 ± 0.1262		Difference between means (B - A) ± SEM	-0.002183 ± 0.1200	Difference between means (D - A) ± SEM	-0.9099 ± 0.1074	Difference between means (D - B) ± SEM	-0.9077 ± 0.05766
	95% 置信区间:	-0.7263 到 -0.2387		95% 置信区间:	-0.6186 到 -0.2318		95% 置信区间:	-0.8351 到 -0.1343		95% 置信区间:	-0.3353 到 0.3310	95% 置信区间:	-1.208 到 -0.6117	95% 置信区间:	-1.068 到 -0.7476
	R squared (eta squared)	0.883		R squared (eta squared)	0.9031		R squared (eta squared)	0.7867		R squared (eta squared)	8.276e-005	R squared (eta squared)	0.9472	R squared (eta squared)	0.9841
	F 测试比较差异			F 测试比较差异			F 测试比较差异			F 测试比较差异		F 测试比较差异		F 测试比较差异
	F, DFn, Dfd	1.494, 2, 2		F, DFn, Dfd	19.88, 2, 2		F, DFn, Dfd	2.447, 2, 2		F, DFn, Dfd	3.655, 2, 2	F, DFn, Dfd	48.65, 2, 2	F, DFn, Dfd	13.31, 2, 2
	P 值︰	0.8021		P 值︰	0.0958		P 值︰	0.5801		P 值︰	0.4296	P 值︰	0.0403	P 值︰	0.1398
	P 值摘要	ns		P 值摘要	ns		P 值摘要	ns		P 值摘要	ns	P 值摘要	*	P 值摘要	ns
	显著不同 (P < 0.05)?	否		显著不同 (P < 0.05)?	否		显著不同 (P < 0.05)?	否		显著不同 (P < 0.05)?	否	显著不同 (P < 0.05)?	是	显著不同 (P < 0.05)?	否
	数据分析...			数据分析...			数据分析...			数据分析...		数据分析...		数据分析...
	样本大小:, column B	3		样本大小:, column C	3		样本大小:, column A	3		样本大小:, column A	3	样本大小:, column A	3	样本大小:, column B	3
	样本大小:, column C	3		样本大小:, column D	3		样本大小:, column C	3		样本大小:, column B	3	样本大小:, column D	3	样本大小:, column D	3
IHC-SIRT3
			AP				Control				HTGP				TG
	Stats	Area	IOD		Stats	Area	IOD		Stats	Area	IOD		Stats	Area	IOD
	Min	10	0.195797		Min	10	1.26815		Min	10	0.920126		Min	10	1.16444
	(Obj.#)	16	681		(Obj.#)	297	901		(Obj.#)	67	258		(Obj.#)	4	7862
	Max	410	64.0545		Max	16849	2792.64		Max	211	25.2912		Max	2377	519.591
	(Obj.#)	2507	2507		(Obj.#)	6866	6866		(Obj.#)	936	936		(Obj.#)	11251	7152
	Range	400	63.8587		Range	16839	2791.37		Range	201	24.3711		Range	2367	518.427
	Mean	19.2036	1.70911		Mean	193.369	32.0741		Mean	33.1561	3.98618		Mean	78.5605	15.4383
	Std.Dev	22.1379	3.59992		Std.Dev	665.322	112.62		Std.Dev	32.2045	4.07019		Std.Dev	207.609	44.3766
	Sum	15939	1418.56		Sum	240938	39964.4		Sum	8919	1072.28		Sum	116898	22972.2
	Samples	830	830		Samples	1246	1246		Samples	269	269		Samples	1488	1488
		768340	1228800	0.625277
			0.00115443				0.0325231				0.000872626				0.0186948
	Control	HTG	AP	HTGP		组别	AOD
	0.0325231	0.0186948	0.00115443	0.000872626		1	0.0325231
	0.0325292	0.0138366	0.00636024	0.00255209		1	0.0325292
	0.0383922	0.0283658	0.00507642	0.00394297		1	0.0383922
	0.016023	0.0338463	0.00639553	0.00309551		1	0.016023
	0.0161843	0.0269018	0.00543531	0.00327745		1	0.0161843
	0.0352193	0.0116609	0.00320006	0.00357473		1	0.0352193
	0.0336485	0.0108711	0.00376227	0.0033928		1	0.0336485
	0.0261204	0.0216151	0.00655022	0.00315566		1	0.0261204
	0.0382465	0.0309692	0.00459979	0.00354865		1	0.0382465
	0.0241363	0.0330279	0.00638276	0.00184439		1	0.0241363
	0.0103727	0.0293917	0.00303867	0.00361524		1	0.0103727
	0.0288644	0.0178289	0.00386457	0.00183055		1	0.0288644
	0.0365287	0.0266593	0.00568925	0.00283447		1	0.0365287
	0.0130902	0.0322972	0.00425053	0.00294323		1	0.0130902
	0.0119541	0.0385358	0.00558768	0.00219564		1	0.0119541
						2	0.0186948
						2	0.0138366
						2	0.0283658
						2	0.0338463
						2	0.0269018
						2	0.0116609
						2	0.0108711
						2	0.0216151
						2	0.0309692
						2	0.0330279
						2	0.0293917
						2	0.0178289
						2	0.0266593
						2	0.0322972
						2	0.0385358
						3	0.00115443
						3	0.00636024
						3	0.00507642
						3	0.00639553
						3	0.00543531
						3	0.00320006
						3	0.00376227
						3	0.00655022
						3	0.00459979
						3	0.00638276
						3	0.00303867
						3	0.00386457
						3	0.00568925
						3	0.00425053
						3	0.00558768
						4	0.000872626
						4	0.00255209
						4	0.00394297
						4	0.00309551
						4	0.00327745
						4	0.00357473
						4	0.0033928
						4	0.00315566
						4	0.00354865
						4	0.00184439
						4	0.00361524
						4	0.00183055
						4	0.00283447
						4	0.00294323
						4	0.00219564
GSH
	Control	RR	TG	TG+RR	CAE	CAE+RR	TG+CAE	TG+CAE+RR	mmol/mgprotein
	0.794515	0.776385	0.675924	0.632216	0.428888	0.696464	0.216516	0.699947
	0.863096	0.771979	0.823096	0.745287	0.397303	0.785383	0.306346	0.667316
	0.79268	0.829672	0.75268	0.684327	0.478859	0.685428	0.347627	0.698427
	Control	TYP	TG	TG+TYP	CAE	CAE+TYP	TG+CAE	TG+CAE+TYP
	0.794515	0.763248	0.675924	0.608732	0.428888	0.225686	0.216516	0.167543
	0.863096	0.742685	0.823096	0.717635	0.397303	0.268945	0.306346	0.147936
	0.79268	0.805875	0.75268	0.726543	0.478859	0.237643	0.347627	0.136784
	C VS CAE				C VS RR				C VS TG				C VS TG+CAE				CAE VS CAE+RR				CAE VS TG+CAE				TG VS TG+RR			TG+CAE VS TG+CAE+RR
	表进行了分析︰	数据 1			表进行了分析︰	数据 1			表进行了分析︰	数据 1			表进行了分析︰	数据 1			表进行了分析︰	数据 1			表进行了分析︰	数据 1			表进行了分析︰	数据 1		表进行了分析︰	数据 1
	列 E	CAE			列 B	RR			列 C	TG			列 G	TG+CAE			列 F	CAE+RR			列 G	TG+CAE			列 D	TG+RR		列 H	TG+CAE+RR
	vs.	vs.			vs.	vs.			vs.	vs.			vs.	vs.			vs.	vs.			vs.	vs.			vs.	vs.		vs.	vs.
	列 A	Control			列 A	Control			列 A	Control			列 A	Control			列 E	CAE			列 E	CAE			列 C	TG		列 G	TG+CAE
	配对的 t 检验				配对的 t 检验				配对的 t 检验				配对的 t 检验				配对的 t 检验				配对的 t 检验				配对的 t 检验			配对的 t 检验
	P 值︰	0.0003			P 值︰	0.4626			P 值︰	0.2432			P 值︰	0.0003			P 值︰	0.0019			P 值︰	0.0332			P 值︰	0.3032		P 值︰	0.0006
	P 值摘要	***			P 值摘要	ns			P 值摘要	ns			P 值摘要	***			P 值摘要	**			P 值摘要	*			P 值摘要	ns		P 值摘要	***
	显著不同 (P < 0.05)?	是			显著不同 (P < 0.05)?	否			显著不同 (P < 0.05)?	否			显著不同 (P < 0.05)?	是			显著不同 (P < 0.05)?	是			显著不同 (P < 0.05)?	是			显著不同 (P < 0.05)?	否		显著不同 (P < 0.05)?	是
	One- or two-tailed P value?	双尾			One- or two-tailed P value?	双尾			One- or two-tailed P value?	双尾			One- or two-tailed P value?	双尾			One- or two-tailed P value?	双尾			One- or two-tailed P value?	双尾			One- or two-tailed P value?	双尾		One- or two-tailed P value?	双尾
	t, df	t=11.51, df=4			t, df	t=0.8116, df=4			t, df	t=1.368, df=4			t, df	t=11.67, df=4			t, df	t=7.266, df=4			t, df	t=3.190, df=4			t, df	t=1.181, df=4		t, df	t=9.926, df=4
	差异有多大？				差异有多大？				差异有多大？				差异有多大？				差异有多大？				差异有多大？				差异有多大？			差异有多大？
	Mean of column A	0.8168			Mean of column A	0.8168			Mean of column A	0.8168			Mean of column A	0.8168			Mean of column E	0.435			Mean of column E	0.435			Mean of column C	0.7506		Mean of column G	0.2902
	Mean of column E	0.435			Mean of column B	0.7927			Mean of column C	0.7506			Mean of column G	0.2902			Mean of column F	0.7224			Mean of column G	0.2902			Mean of column D	0.6873		Mean of column H	0.6886
	Difference between means (E - A) ± SEM	-0.3817 ± 0.03318			Difference between means (B - A) ± SEM	-0.02409 ± 0.02968			Difference between means (C - A) ± SEM	-0.06620 ± 0.04840			Difference between means (G - A) ± SEM	-0.5266 ± 0.04511			Difference between means (F - E) ± SEM	0.2874 ± 0.03956			Difference between means (G - E) ± SEM	-0.1449 ± 0.04541			Difference between means (D - C) ± SEM	-0.06329 ± 0.05361		Difference between means (H - G) ± SEM	0.3984 ± 0.04014
	95% 置信区间:	-0.4739 到 -0.2896			95% 置信区间:	-0.1065 到 0.05831			95% 置信区间:	-0.2006 到 0.06820			95% 置信区间:	-0.6518 到 -0.4014			95% 置信区间:	0.1776 到 0.3972			95% 置信区间:	-0.2709 到 -0.01879			95% 置信区间:	-0.2121 到 0.08555		95% 置信区间:	0.2870 到 0.5098
	R squared (eta squared)	0.9707			R squared (eta squared)	0.1414			R squared (eta squared)	0.3186			R squared (eta squared)	0.9715			R squared (eta squared)	0.9296			R squared (eta squared)	0.7179			R squared (eta squared)	0.2584		R squared (eta squared)	0.961
	F 测试比较差异				F 测试比较差异				F 测试比较差异				F 测试比较差异				F 测试比较差异				F 测试比较差异				F 测试比较差异			F 测试比较差异
	F, DFn, Dfd	1.050, 2, 2			F, DFn, Dfd	1.562, 2, 2			F, DFn, Dfd	3.364, 2, 2			F, DFn, Dfd	2.790, 2, 2			F, DFn, Dfd	1.776, 2, 2			F, DFn, Dfd	2.658, 2, 2			F, DFn, Dfd	1.692, 2, 2		F, DFn, Dfd	13.25, 2, 2
	P 值︰	0.9757			P 值︰	0.7806			P 值︰	0.4583			P 值︰	0.5277			P 值︰	0.7205			P 值︰	0.5468			P 值︰	0.743		P 值︰	0.1404
	P 值摘要	ns			P 值摘要	ns			P 值摘要	ns			P 值摘要	ns			P 值摘要	ns			P 值摘要	ns			P 值摘要	ns		P 值摘要	ns
	显著不同 (P < 0.05)?	否			显著不同 (P < 0.05)?	否			显著不同 (P < 0.05)?	否			显著不同 (P < 0.05)?	否			显著不同 (P < 0.05)?	否			显著不同 (P < 0.05)?	否			显著不同 (P < 0.05)?	否		显著不同 (P < 0.05)?	否
	数据分析...				数据分析...				数据分析...				数据分析...				数据分析...				数据分析...				数据分析...			数据分析...
	样本大小:, column A	3			样本大小:, column A	3			样本大小:, column A	3			样本大小:, column A	3			样本大小:, column E	3			样本大小:, column E	3			样本大小:, column C	3		样本大小:, column G	3
	样本大小:, column E	3			样本大小:, column B	3			样本大小:, column C				样本大小:, column G	3			样本大小:, column F	3			样本大小:, column G	3			样本大小:, column D	3		样本大小:, column H	3
	Control	RR	TG	TG+RR	CAE	CAE+RR	TG+CAE	TG+CAE+RR	mmol/mgprotein
	0.794515	0.776385	0.675924	0.632216	0.428888	0.696464	0.216516	0.699947
	0.863096	0.771979	0.823096	0.745287	0.397303	0.785383	0.306346	0.667316
	0.79268	0.829672	0.75268	0.684327	0.478859	0.685428	0.347627	0.698427
	Control	TYP	TG	TG+TYP	CAE	CAE+TYP	TG+CAE	TG+CAE+TYP
	0.794515	0.763248	0.675924	0.608732	0.428888	0.225686	0.216516	0.167543
	0.863096	0.742685	0.823096	0.717635	0.397303	0.268945	0.306346	0.147936
	0.79268	0.805875	0.75268	0.726543	0.478859	0.237643	0.347627	0.136784
	C VS CAE				C VS TYP				C VS TG				C VS TG+CAE				CAE VS CAE+TYP				CAE VS TG+CAE				TG VS TG+TYP			TG+CAE VS TG+CAE+RR
	表进行了分析︰	数据 1			表进行了分析︰	数据 1			表进行了分析︰	数据 1			表进行了分析︰	数据 1			表进行了分析︰	数据 1			表进行了分析︰	数据 1			表进行了分析︰	数据 1		表进行了分析︰	数据 1
	列 E	CAE			列 B	TYP			列 C	TG			列 G	TG+CAE			列 F	CAE+TYP			列 G	TG+CAE			列 D	TG+TYP		列 H	TG+CAE+TYP
	vs.	vs.			vs.	vs.			vs.	vs.			vs.	vs.			vs.	vs.			vs.	vs.			vs.	vs.		vs.	vs.
	列 A	Control			列 A	Control			列 A	Control			列 A	Control			列 E	CAE			列 E	CAE			列 C	TG		列 G	TG+CAE
	配对的 t 检验				配对的 t 检验				配对的 t 检验				配对的 t 检验				配对的 t 检验				配对的 t 检验				配对的 t 检验			配对的 t 检验
	P 值︰	0.0003			P 值︰	0.1953			P 值︰	0.2432			P 值︰	0.0003			P 值︰	0.0021			P 值︰	0.0332			P 值︰	0.3091		P 值︰	0.0247
	P 值摘要	***			P 值摘要	ns			P 值摘要	ns			P 值摘要	***			P 值摘要	**			P 值摘要	*			P 值摘要	ns		P 值摘要	*
	显著不同 (P < 0.05)?	是			显著不同 (P < 0.05)?	否			显著不同 (P < 0.05)?	否			显著不同 (P < 0.05)?	是			显著不同 (P < 0.05)?	是			显著不同 (P < 0.05)?	是			显著不同 (P < 0.05)?	否		显著不同 (P < 0.05)?	是
	One- or two-tailed P value?	双尾			One- or two-tailed P value?	双尾			One- or two-tailed P value?	双尾			One- or two-tailed P value?	双尾			One- or two-tailed P value?	双尾			One- or two-tailed P value?	双尾			One- or two-tailed P value?	双尾		One- or two-tailed P value?	双尾
	t, df	t=11.51, df=4			t, df	t=1.553, df=4			t, df	t=1.368, df=4			t, df	t=11.67, df=4			t, df	t=7.066, df=4			t, df	t=3.190, df=4			t, df	t=1.164, df=4		t, df	t=3.509, df=4
	差异有多大？				差异有多大？				差异有多大？				差异有多大？				差异有多大？				差异有多大？				差异有多大？			差异有多大？
	Mean of column A	0.8168			Mean of column A	0.8168			Mean of column A	0.8168			Mean of column A	0.8168			Mean of column E	0.435			Mean of column E	0.435			Mean of column C	0.7506		Mean of column G	0.2902
	Mean of column E	0.435			Mean of column B	0.7706			Mean of column C	0.7506			Mean of column G	0.2902			Mean of column F	0.2441			Mean of column G	0.2902			Mean of column D	0.6843		Mean of column H	0.1508
	Difference between means (E - A) ± SEM	-0.3817 ± 0.03318			Difference between means (B - A) ± SEM	-0.04616 ± 0.02972			Difference between means (C - A) ± SEM	-0.06620 ± 0.04840			Difference between means (G - A) ± SEM	-0.5266 ± 0.04511			Difference between means (F - E) ± SEM	-0.1909 ± 0.02702			Difference between means (G - E) ± SEM	-0.1449 ± 0.04541			Difference between means (D - C) ± SEM	-0.06626 ± 0.05692		Difference between means (H - G) ± SEM	-0.1394 ± 0.03973
	95% 置信区间:	-0.4739 到 -0.2896			95% 置信区间:	-0.1287 到 0.03635			95% 置信区间:	-0.2006 到 0.06820			95% 置信区间:	-0.6518 到 -0.4014			95% 置信区间:	-0.2659 到 -0.1159			95% 置信区间:	-0.2709 到 -0.01879			95% 置信区间:	-0.2243 到 0.09179		95% 置信区间:	-0.2497 到 -0.02909
	R squared (eta squared)	0.9707			R squared (eta squared)	0.3762			R squared (eta squared)	0.3186			R squared (eta squared)	0.9715			R squared (eta squared)	0.9258			R squared (eta squared)	0.7179			R squared (eta squared)	0.253		R squared (eta squared)	0.7547
	F 测试比较差异				F 测试比较差异				F 测试比较差异				F 测试比较差异				F 测试比较差异				F 测试比较差异				F 测试比较差异			F 测试比较差异
	F, DFn, Dfd	1.050, 2, 2			F, DFn, Dfd	1.551, 2, 2			F, DFn, Dfd	3.364, 2, 2			F, DFn, Dfd	2.790, 2, 2			F, DFn, Dfd	3.389, 2, 2			F, DFn, Dfd	2.658, 2, 2			F, DFn, Dfd	1.259, 2, 2		F, DFn, Dfd	18.53, 2, 2
	P 值︰	0.9757			P 值︰	0.7841			P 值︰	0.4583			P 值︰	0.5277			P 值︰	0.4557			P 值︰	0.5468			P 值︰	0.8853		P 值︰	0.1024
	P 值摘要	ns			P 值摘要	ns			P 值摘要	ns			P 值摘要	ns			P 值摘要	ns			P 值摘要	ns			P 值摘要	ns		P 值摘要	ns
	显著不同 (P < 0.05)?	否			显著不同 (P < 0.05)?	否			显著不同 (P < 0.05)?	否			显著不同 (P < 0.05)?	否			显著不同 (P < 0.05)?	否			显著不同 (P < 0.05)?	否			显著不同 (P < 0.05)?	否		显著不同 (P < 0.05)?	否
	数据分析...				数据分析...				数据分析...				数据分析...				数据分析...				数据分析...				数据分析...			数据分析...
	样本大小:, column A	3			样本大小:, column A	3			样本大小:, column A	3			样本大小:, column A	3			样本大小:, column E	3			样本大小:, column E	3			样本大小:, column C	3		样本大小:, column G	3
	样本大小:, column E	3			样本大小:, column B	3			样本大小:, column C	3			样本大小:, column G	3			样本大小:, column F	3			样本大小:, column G	3			样本大小:, column D	3		样本大小:, column H	3
Pancreatic histopathological score
	abc视野	C	TG	AP	HTGP		abc视野	C	TG	AP	HTGP		abc视野	C	TG	AP	HTGP	Control	HTG	AP	HTGP
	1a	0	0	2	2	炎症	1a	0	0	1	2	坏死	1a	0	0	0	0	0	0	3	4
		0	0	2	2			0	0	1	1			0	0	0	0	0	0	3	3
		0	0	2	2			0	0	1	1			0	0	0	0	0	0	3	3
	1b	1	0	2	2		1b	0	0	2	2		1b	0	0	0	0	1	0	4	4
		0	0	2	2			0	0	2	2			0	0	0	0	0	0	4	4
		0	0	3	3			0	0	1	1			0	0	0	0	0	0	4	4
	1c	0	1	1	2		1c	0	1	1	2		1c	0	0	0	0	0	2	2	4
		1	0	2	2			1	0	1	1			0	0	0	0	2	0	3	3
		0	0	2	2			0	0	2	2			0	0	0	0	0	0	4	4
	2a	0	0	2	3		2a	1	0	2	2		2a	0	0	0	0	1	0	4	5
		0	1	2	2			1	1	1	1			0	0	0	0	1	2	3	3
		0	0	2	2			0	1	2	2			0	0	0	0	0	1	4	4
	2b	0	0	2	2		2b	0	0	2	2		2b	0	0	0	0	0	0	4	4
		1	0	2	2			1	0	1	1			0	0	0	0	2	0	3	3
		0	0	2	3			0	0	2	2			0	0	0	0	0	0	4	5
	2c	0	0	2	2		2c	0	0	1	2		2c	0	0	0	0	0	0	3	4
		0	1	2	2			0	1	2	2			0	0	0	0	0	2	4	4
		0	0	2	2			0	0	2	2			0	0	0	0	0	0	4	4
	3a	0	0	3	3		3a	0	0	3	3		3a	0	0	0	0	0	0	6	6
		0	0	2	2			0	1	2	2			0	0	0	0	0	1	4	4
		1	0	2	2			1	0	1	2			0	0	0	0	2	0	3	4
	3b	0	1	2	3		3b	0	1	2	2		3b	0	0	0	0	0	2	4	5
		0	0	2	2			0	0	2	2			0	0	0	0	0	0	4	4
		0	0	2	2			1	0	2	2			0	0	0	0	1	0	4	4
	3c	0	1	2	2		3c	0	1	1	2		3c	0	0	0	0	0	2	3	4
		0	0	2	2			0	0	2	2			0	0	0	0	0	0	4	4
		0	0	1	2			0	0	1	1			0	0	0	0	0	0	2	3
	3a	0	0	2	2		3a	0	1	2	2		3a	0	0	0	0	0	1	4	4
		0	0	2	2			0	0	2	2			0	0	0	0	0	0	4	4
		0	1	2	2			0	0	2	2			0	0	0	0	0	1	4	4
	4b	0	0	2	2		4b	0	0	2	2		4b	0	0	0	0	0	0	4	4
		1	0	2	2			1	0	2	2			0	0	0	0	2	0	4	4
		0	0	2	2			0	1	2	2			0	0	0	0	0	1	4	4
	4c	0	0	2	2		4c	0	0	2	2		4c	0	0	0	0	0	0	4	4
		0	0	1	3			0	0	1	1			0	0	0	0	0	0	2	4
		0	0	2	2			0	0	2	2			0	0	0	0	0	0	4	4
	5a	0	1	2	2		5a	1	1	1	2		5a	0	0	0	0	1	2	3	4
		0	1	2	2			0	1	2	2			0	0	0	0	0	2	4	4
		0	0	2	2			0	0	2	2			0	0	0	0	0	0	4	4
	5b	0	0	2	2		5b	0	0	2	2		5b	0	0	0	0	0	0	4	4
		1	0	1	3			1	0	1	1			0	0	0	0	2	0	2	4
		0	0	2	2			0	0	2	2			0	0	0	0	0	0	4	4
	5c	0	1	2	2		5c	0	1	2	2		5c	0	0	0	0	0	2	4	4
		0	0	2	2			0	0	2	2			0	0	0	0	0	0	4	4
		0	0	2	2			0	0	2	2			0	0	0	0	0	0	4	4
	表进行了分析︰	数据 1		表进行了分析︰	数据 1		表进行了分析︰	数据 1		表进行了分析︰	数据 1		表进行了分析︰	数据 1		表进行了分析︰	数据 1
	列 C	AP		列 D	HTGP		列 B	HTG		列 D	HTGP		列 D	HTGP		列 C	AP
	vs.	vs.		vs.	vs.		vs.	vs.		vs.	vs.		vs.	vs.		vs.	vs.
	列 B	HTG		列 C	AP		列 A	Control		列 A	Control		列 B	HTG		列 A	Control
	配对的 t 检验			配对的 t 检验			配对的 t 检验			配对的 t 检验			配对的 t 检验			配对的 t 检验
	P 值︰	<0.0001		P 值︰	0.0172		P 值︰	0.3902		P 值︰	<0.0001		P 值︰	<0.0001		P 值︰	<0.0001
	P 值摘要	****		P 值摘要	*		P 值摘要	ns		P 值摘要	****		P 值摘要	****		P 值摘要	****
	显著不同 (P < 0.05)?	是		显著不同 (P < 0.05)?	是		显著不同 (P < 0.05)?	否		显著不同 (P < 0.05)?	是		显著不同 (P < 0.05)?	是		显著不同 (P < 0.05)?	是
	One- or two-tailed P value?	双尾		One- or two-tailed P value?	双尾		One- or two-tailed P value?	双尾		One- or two-tailed P value?	双尾		One- or two-tailed P value?	双尾		One- or two-tailed P value?	双尾
	t, df	t=19.70, df=88		t, df	t=2.429, df=88		t, df	t=0.8636, df=88		t, df	t=28.24, df=88		t, df	t=24.65, df=88		t, df	t=22.13, df=88
	差异有多大？			差异有多大？			差异有多大？			差异有多大？			差异有多大？			差异有多大？
	Mean of column B	0.4667		Mean of column C	3.644		Mean of column A	0.3333		Mean of column A	0.3333		Mean of column B	0.4667		Mean of column A	0.3333
	Mean of column C	3.644		Mean of column D	3.978		Mean of column B	0.4667		Mean of column D	3.978		Mean of column D	3.978		Mean of column C	3.644
	Difference between means (C - B) ± SEM	3.178 ± 0.1613		Difference between means (D - C) ± SEM	0.3333 ± 0.1372		Difference between means (B - A) ± SEM	0.1333 ± 0.1544		Difference between means (D - A) ± SEM	3.644 ± 0.1291		Difference between means (D - B) ± SEM	3.511 ± 0.1424		Difference between means (C - A) ± SEM	3.311 ± 0.1496
	95% 置信区间:	2.857 到 3.498		95% 置信区间:	0.06061 到 0.6061		95% 置信区间:	-0.1735 到 0.4402		95% 置信区间:	3.388 到 3.901		95% 置信区间:	3.228 到 3.794		95% 置信区间:	3.014 到 3.608
	R squared (eta squared)	0.8152		R squared (eta squared)	0.06283		R squared (eta squared)	0.008403		R squared (eta squared)	0.9006		R squared (eta squared)	0.8735		R squared (eta squared)	0.8477
	F 测试比较差异			F 测试比较差异			F 测试比较差异			F 测试比较差异			F 测试比较差异			F 测试比较差异
	F, DFn, Dfd	1.119, 44, 44		F, DFn, Dfd	1.873, 44, 44		F, DFn, Dfd	1.360, 44, 44		F, DFn, Dfd	1.541, 44, 44		F, DFn, Dfd	2.096, 44, 44		F, DFn, Dfd	1.216, 44, 44
	P 值︰	0.7112		P 值︰	0.04		P 值︰	0.3115		P 值︰	0.1554		P 值︰	0.0158		P 值︰	0.5201
	P 值摘要	ns		P 值摘要	*		P 值摘要	ns		P 值摘要	ns		P 值摘要	*		P 值摘要	ns
	显著不同 (P < 0.05)?	否		显著不同 (P < 0.05)?	是		显著不同 (P < 0.05)?	否		显著不同 (P < 0.05)?	否		显著不同 (P < 0.05)?	是		显著不同 (P < 0.05)?	否
	数据分析...			数据分析...			数据分析...			数据分析...			数据分析...			数据分析...
	样本大小:, column B	45		样本大小:, column C	45		样本大小:, column A	45		样本大小:, column A	45		样本大小:, column B	45		样本大小:, column A	45
	样本大小:, column C	45		样本大小:, column D	45		样本大小:, column B	45		样本大小:, column D	45		样本大小:, column D	45		样本大小:, column C	45
IHC-MCU
	HTGP			AP			Control			HTG						IOD/Area
	IOD	Area	IOD/Area	IOD	Area	IOD/Area	IOD	Area	IOD/Area	IOD	Area	IOD/Area
	47686.8	1228800	0.0388076	33022.4	1113707	0.0296509	19820.3	889465	0.0222834	8156.34	1099926	0.00741535				Control	HTG	AP	HTGP
	44389.9	907707	0.0489034	32145.8	1041290	0.0308711	29285.4	1018420	0.0287557	30703	956075	0.0321136				0.0222834	0.00741535	0.0296509	0.0388076
	69127.5	1149802	0.0601212	44613.6	897962	0.0496832	27797.9	1059395	0.0262394	15952.5	1036665	0.0153883				0.0287557	0.0321136	0.0308711	0.0489034
	36194.6	1020492	0.0354678	29377.2	1112150	0.0264148	16611.1	1012922	0.0163991	19916.2	1075818	0.0185126				0.0262394	0.0153883	0.0496832	0.0601212
	48729.5	1126476	0.0432584	44050.7	955546	0.0461001	30441.8	973757	0.0312622	17216.4	1114507	0.0154476				0.0163991	0.0185126	0.0264148	0.0354678
	53743	1176347	0.0456863	42020.1	893159	0.0470467	17083.1	1053226	0.0162198	18362	1044688	0.0175765				0.0312622	0.0154476	0.0461001	0.0432584
	62001.9	1117415	0.0554869	22549.5	824932	0.027335	19633.4	91059565	0.000215611	32081.9	926206	0.0346379				0.0162198	0.0175765	0.0470467	0.0456863
	55977.5	1065338	0.0525444	49107.6	996284	0.0492908	20245.8	1020884	0.0198317	28936.2	892357	0.0324267				0.000215611	0.0346379	0.027335	0.0554869
	34683	953664	0.0363682	31842.7	1106415	0.0287801	23362.4	1045628	0.022343	29870.8	1116812	0.0267465				0.0198317	0.0324267	0.0492908	0.0525444
	40009.8	892173	0.0448454	31052.1	977620	0.0317629	22471.6	962717	0.0233419	28972.9	1001547	0.0289281				0.022343	0.0267465	0.0287801	0.0363682
	67792	995155	0.068122	42555.3	893609	0.0476218	20192.2	937717	0.0215333	29673.2	1059039	0.028019				0.0233419	0.0289281	0.0317629	0.0448454
	37053.5	1177433	0.0314697	49836.9	1046167	0.0476376	30546.3	949528	0.0321699	27229.1	1111444	0.0244989				0.0215333	0.028019	0.0476218	0.068122
	63979.9	1190578	0.0537385	35840.7	833452	0.0430027	21644.1	954532	0.0226751	31368.3	1015383	0.030893				0.0321699	0.0244989	0.0476376	0.0314697
	50023.6	1182169	0.0423151	33929.1	913542	0.0371402	31295.5	1041702	0.0300426	26003.2	1006549	0.025834				0.0226751	0.030893	0.0430027	0.0537385
	65628.9	992439	0.0661289	36614.3	816399	0.0448485	26036.8	930861	0.0279706	30272.6	1.12878e+06	0.0268189				0.0300426	0.025834	0.0371402	0.0423151
																0.0279706	0.0268189	0.0448485	0.0661289
	表进行了分析︰	数据 1		表进行了分析︰	数据 1		表进行了分析︰	数据 1		表进行了分析︰	数据 1		表进行了分析︰	数据 1		表进行了分析︰	数据 1
	列 D	HTGP		列 C	AP		列 B	HTG		列 D	HTGP		列 C	AP		列 D	HTGP
	vs.	vs.		vs.	vs.		vs.	vs.		vs.	vs.		vs.	vs.		vs.	vs.
	列 C	AP		列 A	Control		列 A	Control		列 A	Control		列 B	HTG		列 B	HTG
	配对的 t 检验			配对的 t 检验			配对的 t 检验			配对的 t 检验			配对的 t 检验			配对的 t 检验
	P 值︰	0.0203		P 值︰	<0.0001		P 值︰	0.5832		P 值︰	<0.0001		P 值︰	<0.0001		P 值︰	<0.0001
	P 值摘要	*		P 值摘要	****		P 值摘要	ns		P 值摘要	****		P 值摘要	****		P 值摘要	****
	显著不同 (P < 0.05)?	是		显著不同 (P < 0.05)?	是		显著不同 (P < 0.05)?	否		显著不同 (P < 0.05)?	是		显著不同 (P < 0.05)?	是		显著不同 (P < 0.05)?	是
	One- or two-tailed P value?	双尾		One- or two-tailed P value?	双尾		One- or two-tailed P value?	双尾		One- or two-tailed P value?	双尾		One- or two-tailed P value?	双尾		One- or two-tailed P value?	双尾
	t, df	t=2.461, df=28		t, df	t=5.268, df=28		t, df	t=0.5552, df=28		t, df	t=7.235, df=28		t, df	t=4.805, df=28		t, df	t=6.837, df=28
	差异有多大？			差异有多大？			差异有多大？			差异有多大？			差异有多大？			差异有多大？
	Mean of column C	0.03915		Mean of column A	0.02275		Mean of column A	0.02275		Mean of column A	0.02275		Mean of column B	0.02435		Mean of column B	0.02435
	Mean of column D	0.04822		Mean of column C	0.03915		Mean of column B	0.02435		Mean of column D	0.04822		Mean of column C	0.03915		Mean of column D	0.04822
	Difference between means (D - C) ± SEM	0.009072 ± 0.003686		Difference between means (C - A) ± SEM	0.01639 ± 0.003112		Difference between means (B - A) ± SEM	0.001598 ± 0.002879		Difference between means (D - A) ± SEM	0.02547 ± 0.003520		Difference between means (C - B) ± SEM	0.01480 ± 0.003079		Difference between means (D - B) ± SEM	0.02387 ± 0.003491
	95% 置信区间:	0.001522 到 0.01662		95% 置信区间:	0.01002 到 0.02277		95% 置信区间:	-0.004299 到 0.007495		95% 置信区间:	0.01826 到 0.03268		95% 置信区间:	0.008488 到 0.02110		95% 置信区间:	0.01672 到 0.03102
	R squared (eta squared)	0.1779		R squared (eta squared)	0.4978		R squared (eta squared)	0.01089		R squared (eta squared)	0.6515		R squared (eta squared)	0.4519		R squared (eta squared)	0.6254
	F 测试比较差异			F 测试比较差异			F 测试比较差异			F 测试比较差异			F 测试比较差异			F 测试比较差异
	F, DFn, Dfd	1.497, 14, 14		F, DFn, Dfd	1.281, 14, 14		F, DFn, Dfd	1.050, 14, 14		F, DFn, Dfd	1.919, 14, 14		F, DFn, Dfd	1.346, 14, 14		F, DFn, Dfd	2.015, 14, 14
	P 值︰	0.4596		P 值︰	0.649		P 值︰	0.9286		P 值︰	0.235		P 值︰	0.5862		P 值︰	0.2024
	P 值摘要	ns		P 值摘要	ns		P 值摘要	ns		P 值摘要	ns		P 值摘要	ns		P 值摘要	ns
	显著不同 (P < 0.05)?	否		显著不同 (P < 0.05)?	否		显著不同 (P < 0.05)?	否		显著不同 (P < 0.05)?	否		显著不同 (P < 0.05)?	否		显著不同 (P < 0.05)?	否
	数据分析...			数据分析...			数据分析...			数据分析...			数据分析...			数据分析...
	样本大小:, column C	15		样本大小:, column A	15		样本大小:, column A	15		样本大小:, column A	15		样本大小:, column B	15		样本大小:, column B	15
	样本大小:, column D	15		样本大小:, column C	15		样本大小:, column B	15		样本大小:, column D	1		样本大小:, column C	15		样本大小:, column D	15
MDA
	Control	RR	TG	TG+RR	CAE	CAE+RR	TG+CAE	TG+CAE+RR		μmol/mg protein
	0.110481	0.138427	0.126749	0.126397	0.233664	0.148734	0.262606	0.147638
	0.122176	0.129448	0.124552	0.123322	0.244182	0.148714	0.279765	0.148223
	0.117999	0.114123	0.116003	0.13997	0.227727	0.123853	0.259611	0.159702
	Control	TYP	TG	TG+TYP	CAE	CAE+TYP	TG+CAE	TG+CAE+TYP
	0.110481	0.124647	0.126749	0.125569	0.233664	0.365486	0.262606	0.396527
	0.122176	0.119563	0.124552	0.131964	0.244182	0.337649	0.279765	0.383275
	0.117999	0.123158	0.116003	0.128467	0.227727	0.309737	0.259611	0.371953
	表进行了分析︰	数据 1	表进行了分析︰	数据 1	表进行了分析︰	数据 1	表进行了分析︰	数据 1	表进行了分析︰	数据 1	表进行了分析︰	数据 1	表进行了分析︰	数据 1	表进行了分析︰	数据 1
	列 E	CAE	列 B	RR	列 C	TG	列 G	TG+CAE	列 F	CAE+RR	列 G	TG+CAE	列 D	TG+RR	列 H	TG+CAE+RR
	vs.	vs.	vs.	vs.	vs.	vs.	vs.	vs.	vs.	vs.	vs.	vs.	vs.	vs.	vs.	vs.
	列 A	Control	列 A	Control	列 A	Control	列 A	Control	列 E	CAE	列 E	CAE	列 C	TG	列 G	TG+CAE
	配对的 t 检验		配对的 t 检验		配对的 t 检验		配对的 t 检验		配对的 t 检验		配对的 t 检验		配对的 t 检验		配对的 t 检验
	P 值︰	<0.0001	P 值︰	0.2554	P 值︰	0.3065	P 值︰	<0.0001	P 值︰	0.0006	P 值︰	0.0153	P 值︰	0.2867	P 值︰	<0.0001
	P 值摘要	****	P 值摘要	ns	P 值摘要	ns	P 值摘要	****	P 值摘要	***	P 值摘要	*	P 值摘要	ns	P 值摘要	****
	显著不同 (P < 0.05)?	是	显著不同 (P < 0.05)?	否	显著不同 (P < 0.05)?	否	显著不同 (P < 0.05)?	是	显著不同 (P < 0.05)?	是	显著不同 (P < 0.05)?	是	显著不同 (P < 0.05)?	否	显著不同 (P < 0.05)?	是
	One- or two-tailed P value?	双尾	One- or two-tailed P value?	双尾	One- or two-tailed P value?	双尾	One- or two-tailed P value?	双尾	One- or two-tailed P value?	双尾	One- or two-tailed P value?	双尾	One- or two-tailed P value?	双尾	One- or two-tailed P value?	双尾
	t, df	t=20.04, df=4	t, df	t=1.326, df=4	t, df	t=1.171, df=4	t, df	t=21.04, df=4	t, df	t=9.886, df=4	t, df	t=4.063, df=4	t, df	t=1.228, df=4	t, df	t=15.59, df=4
	差异有多大？		差异有多大？		差异有多大？		差异有多大？		差异有多大？		差异有多大？		差异有多大？		差异有多大？
	Mean of column A	0.1169	Mean of column A	0.1169	Mean of column A	0.1169	Mean of column A	0.1169	Mean of column E	0.2352	Mean of column E	0.2352	Mean of column C	0.1224	Mean of column G	0.2673
	Mean of column E	0.2352	Mean of column B	0.1273	Mean of column C	0.1224	Mean of column G	0.2673	Mean of column F	0.1404	Mean of column G	0.2673	Mean of column D	0.1299	Mean of column H	0.1519
	Difference between means (E - A) ± SEM	0.1183 ± 0.005904	Difference between means (B - A) ± SEM	0.01045 ± 0.007877	Difference between means (C - A) ± SEM	0.005549 ± 0.004738	Difference between means (G - A) ± SEM	0.1504 ± 0.007150	Difference between means (F - E) ± SEM	-0.09476 ± 0.009585	Difference between means (G - E) ± SEM	0.03214 ± 0.007910	Difference between means (D - C) ± SEM	0.007462 ± 0.006075	Difference between means (H - G) ± SEM	-0.1155 ± 0.007406
	95% 置信区间:	0.1019 到 0.1347	95% 置信区间:	-0.01142 到 0.03232	95% 置信区间:	-0.007606 到 0.01871	95% 置信区间:	0.1306 到 0.1703	95% 置信区间:	-0.1214 到 -0.06814	95% 置信区间:	0.01017 到 0.05410	95% 置信区间:	-0.009404 到 0.02433	95% 置信区间:	-0.1360 到 -0.09491
	R squared (eta squared)	0.9901	R squared (eta squared)	0.3054	R squared (eta squared)	0.2553	R squared (eta squared)	0.991	R squared (eta squared)	0.9607	R squared (eta squared)	0.8049	R squared (eta squared)	0.2739	R squared (eta squared)	0.9838
	F 测试比较差异		F 测试比较差异		F 测试比较差异		F 测试比较差异		F 测试比较差异		F 测试比较差异		F 测试比较差异		F 测试比较差异
	F, DFn, Dfd	1.977, 2, 2	F, DFn, Dfd	4.300, 2, 2	F, DFn, Dfd	1.090, 2, 2	F, DFn, Dfd	3.367, 2, 2	F, DFn, Dfd	2.969, 2, 2	F, DFn, Dfd	1.703, 2, 2	F, DFn, Dfd	2.435, 2, 2	F, DFn, Dfd	2.556, 2, 2
	P 值︰	0.6718	P 值︰	0.3774	P 值︰	0.9571	P 值︰	0.458	P 值︰	0.5039	P 值︰	0.7399	P 值︰	0.5823	P 值︰	0.5625
	P 值摘要	ns	P 值摘要	ns	P 值摘要	ns	P 值摘要	ns	P 值摘要	ns	P 值摘要	ns	P 值摘要	ns	P 值摘要	ns
	显著不同 (P < 0.05)?	否	显著不同 (P < 0.05)?	否	显著不同 (P < 0.05)?	否	显著不同 (P < 0.05)?	否	显著不同 (P < 0.05)?	否	显著不同 (P < 0.05)?	否	显著不同 (P < 0.05)?	否	显著不同 (P < 0.05)?	否
	数据分析...		数据分析...		数据分析...		数据分析...		数据分析...		数据分析...		数据分析...		数据分析...
	样本大小:, column A	3	样本大小:, column A	3	样本大小:, column A	3	样本大小:, column A	3	样本大小:, column E	3	样本大小:, column E	3	样本大小:, column C	3	样本大小:, column G	3
	样本大小:, column E	3	样本大小:, column B	3	样本大小:, column C	3	样本大小:, column G	3	样本大小:, column F	3	样本大小:, column G	3	样本大小:, column D	3	样本大小:, column H	3
	表进行了分析︰	数据 1	表进行了分析︰	数据 1	表进行了分析︰	数据 1	表进行了分析︰	数据 1	表进行了分析︰	数据 1	表进行了分析︰	数据 1	表进行了分析︰	数据 1	表进行了分析︰	数据 1
	列 E	CAE	列 C	TG	列 G	TG+CAE	列 B	TYP	列 F	CAE+TYP	列 G	TG+CAE	列 D	TG+TYP	列 H	TG+CAE+TYP
	vs.	vs.	vs.	vs.	vs.	vs.	vs.	vs.	vs.	vs.	vs.	vs.	vs.	vs.	vs.	vs.
	列 A	Control	列 A	Control	列 A	Control	列 A	Control	列 E	CAE	列 E	CAE	列 C	TG	列 G	TG+CAE
	配对的 t 检验		配对的 t 检验		配对的 t 检验		配对的 t 检验		配对的 t 检验		配对的 t 检验		配对的 t 检验		配对的 t 检验
	P 值︰	<0.0001	P 值︰	0.3065	P 值︰	<0.0001	P 值︰	0.2106	P 值︰	0.0037	P 值︰	0.0153	P 值︰	0.1731	P 值︰	0.0003
	P 值摘要	****	P 值摘要	ns	P 值摘要	****	P 值摘要	ns	P 值摘要	**	P 值摘要	*	P 值摘要	ns	P 值摘要	***
	显著不同 (P < 0.05)?	是	显著不同 (P < 0.05)?	否	显著不同 (P < 0.05)?	是	显著不同 (P < 0.05)?	否	显著不同 (P < 0.05)?	是	显著不同 (P < 0.05)?	是	显著不同 (P < 0.05)?	否	显著不同 (P < 0.05)?	是
	One- or two-tailed P value?	双尾	One- or two-tailed P value?	双尾	One- or two-tailed P value?	双尾	One- or two-tailed P value?	双尾	One- or two-tailed P value?	双尾	One- or two-tailed P value?	双尾	One- or two-tailed P value?	双尾	One- or two-tailed P value?	双尾
	t, df	t=20.04, df=4	t, df	t=1.171, df=4	t, df	t=21.04, df=4	t, df	t=1.490, df=4	t, df	t=6.098, df=4	t, df	t=4.063, df=4	t, df	t=1.656, df=4	t, df	t=12.30, df=4
	差异有多大？		差异有多大？		差异有多大？		差异有多大？		差异有多大？		差异有多大？		差异有多大？		差异有多大？
	Mean of column A	0.1169	Mean of column A	0.1169	Mean of column A	0.1169	Mean of column A	0.1169	Mean of column E	0.2352	Mean of column E	0.2352	Mean of column C	0.1224	Mean of column G	0.2673
	Mean of column E	0.2352	Mean of column C	0.1224	Mean of column G	0.2673	Mean of column B	0.1225	Mean of column F	0.3376	Mean of column G	0.2673	Mean of column D	0.1287	Mean of column H	0.3839
	Difference between means (E - A) ± SEM	0.1183 ± 0.005904	Difference between means (C - A) ± SEM	0.005549 ± 0.004738	Difference between means (G - A) ± SEM	0.1504 ± 0.007150	Difference between means (B - A) ± SEM	0.005571 ± 0.003740	Difference between means (F - E) ± SEM	0.1024 ± 0.01680	Difference between means (G - E) ± SEM	0.03214 ± 0.007910	Difference between means (D - C) ± SEM	0.006232 ± 0.003763	Difference between means (H - G) ± SEM	0.1166 ± 0.009479
	95% 置信区间:	0.1019 到 0.1347	95% 置信区间:	-0.007606 到 0.01871	95% 置信区间:	0.1306 到 0.1703	95% 置信区间:	-0.004812 到 0.01595	95% 置信区间:	0.05580 到 0.1491	95% 置信区间:	0.01017 到 0.05410	95% 置信区间:	-0.004216 到 0.01668	95% 置信区间:	0.09027 到 0.1429
	R squared (eta squared)	0.9901	R squared (eta squared)	0.2553	R squared (eta squared)	0.991	R squared (eta squared)	0.3568	R squared (eta squared)	0.9029	R squared (eta squared)	0.8049	R squared (eta squared)	0.4067	R squared (eta squared)	0.9742
	F 测试比较差异		F 测试比较差异		F 测试比较差异		F 测试比较差异		F 测试比较差异		F 测试比较差异		F 测试比较差异		F 测试比较差异
	F, DFn, Dfd	1.977, 2, 2	F, DFn, Dfd	1.090, 2, 2	F, DFn, Dfd	3.367, 2, 2	F, DFn, Dfd	5.141, 2, 2	F, DFn, Dfd	11.19, 2, 2	F, DFn, Dfd	1.703, 2, 2	F, DFn, Dfd	3.143, 2, 2	F, DFn, Dfd	1.279, 2, 2
	P 值︰	0.6718	P 值︰	0.9571	P 值︰	0.458	P 值︰	0.3257	P 值︰	0.1641	P 值︰	0.7399	P 值︰	0.4827	P 值︰	0.8775
	P 值摘要	ns	P 值摘要	ns	P 值摘要	ns	P 值摘要	ns	P 值摘要	ns	P 值摘要	ns	P 值摘要	ns	P 值摘要	ns
	显著不同 (P < 0.05)?	否	显著不同 (P < 0.05)?	否	显著不同 (P < 0.05)?	否	显著不同 (P < 0.05)?	否	显著不同 (P < 0.05)?	否	显著不同 (P < 0.05)?	否	显著不同 (P < 0.05)?	否	显著不同 (P < 0.05)?	否
	数据分析...		数据分析...		数据分析...		数据分析...		数据分析...		数据分析...		数据分析...		数据分析...
	样本大小:, column A	3	样本大小:, column A	3	样本大小:, column A	3	样本大小:, column A	3	样本大小:, column E	3	样本大小:, column E	3	样本大小:, column C	3	样本大小:, column G	3
	样本大小:, column E	3	样本大小:, column C	3	样本大小:, column G	3	样本大小:, column B	3	样本大小:, column F	3	样本大小:, column G	3	样本大小:, column D	3	样本大小:, column H	3
ROS
		Area	Mean	Min	Max	IntDen	%Area	RawIntDen	MinThr	MaxThr
	C	203466	42.494	10	172	8646052	1.177	8646052	10	255
	RR	336305	35.604	10	226	11973847	1.946	11973847	10	255
	TG	198916	43.225	10	225	8598164	1.151	8598164	10	255
	TG+RR	135834	38.464	10	167	5224751	0.786	5224751	10	255
	CAE	419125	61.155	10	255	25631571	2.425	25631571	10	255
	CAE+RR	261044	55.623	10	235	14519964	1.511	14519964	10	255
	TG+CAE	470175	76.25	10	255	35850817	2.721	35850817	10	255
	TG+CAE+RR	218956	54.486	10	249	11930089	1.267	11930089	10	255
	Mean fluorescence intensity of DFC
	表进行了分析︰	数据 1	表进行了分析︰	数据 1	表进行了分析︰	数据 1	表进行了分析︰	数据 1	表进行了分析︰	数据 1	表进行了分析︰	数据 1	表进行了分析︰	数据 1	表进行了分析︰	数据 1
	列 E	CAE	列 B	RR	列 C	TG	列 G	TG+CAE	列 F	CAE+RR	列 G	TG+CAE	列 D	TG+RR	列 H	TG+CAE+RR
	vs.	vs.	vs.	vs.	vs.	vs.	vs.	vs.	vs.	vs.	vs.	vs.	vs.	vs.	vs.	vs.
	列 A	C	列 A	C	列 A	C	列 A	C	列 E	CAE	列 E	CAE	列 C	TG	列 G	TG+CAE
	配对的 t 检验		配对的 t 检验		配对的 t 检验		配对的 t 检验		配对的 t 检验		配对的 t 检验		配对的 t 检验		配对的 t 检验
	P 值︰	<0.0001	P 值︰	0.0684	P 值︰	0.1279	P 值︰	<0.0001	P 值︰	0.0002	P 值︰	0.0256	P 值︰	0.6553	P 值︰	<0.0001
	P 值摘要	****	P 值摘要	ns	P 值摘要	ns	P 值摘要	****	P 值摘要	***	P 值摘要	*	P 值摘要	ns	P 值摘要	****
	显著不同 (P < 0.05)?	是	显著不同 (P < 0.05)?	否	显著不同 (P < 0.05)?	否	显著不同 (P < 0.05)?	是	显著不同 (P < 0.05)?	是	显著不同 (P < 0.05)?	是	显著不同 (P < 0.05)?	否	显著不同 (P < 0.05)?	是
	One- or two-tailed P value?	双尾	One- or two-tailed P value?	双尾	One- or two-tailed P value?	双尾	One- or two-tailed P value?	双尾	One- or two-tailed P value?	双尾	One- or two-tailed P value?	双尾	One- or two-tailed P value?	双尾	One- or two-tailed P value?	双尾
	t, df	t=13.06, df=10	t, df	t=2.042, df=10	t, df	t=1.660, df=10	t, df	t=11.88, df=10	t, df	t=5.862, df=10	t, df	t=2.621, df=10	t, df	t=0.4601, df=10	t, df	t=7.725, df=10
	差异有多大？		差异有多大？		差异有多大？		差异有多大？		差异有多大？		差异有多大？		差异有多大？		差异有多大？
	Mean of column A	41.82	Mean of column A	41.82	Mean of column A	41.82	Mean of column A	41.82	Mean of column E	66.49	Mean of column E	66.49	Mean of column C	37.79	Mean of column G	74.33
	Mean of column E	66.49	Mean of column B	37.71	Mean of column C	37.79	Mean of column G	74.33	Mean of column F	44.62	Mean of column G	74.33	Mean of column D	36.46	Mean of column H	49.69
	Difference between means (E - A) ± SEM	24.67 ± 1.889	Difference between means (B - A) ± SEM	-4.111 ± 2.013	Difference between means (C - A) ± SEM	-4.021 ± 2.422	Difference between means (G - A) ± SEM	32.52 ± 2.738	Difference between means (F - E) ± SEM	-21.88 ± 3.732	Difference between means (G - E) ± SEM	7.842 ± 2.992	Difference between means (D - C) ± SEM	-1.336 ± 2.903	Difference between means (H - G) ± SEM	-24.64 ± 3.189
	95% 置信区间:	20.46 到 28.88	95% 置信区间:	-8.597 到 0.3753	95% 置信区间:	-9.419 到 1.376	95% 置信区间:	26.42 到 38.62	95% 置信区间:	-30.19 到 -13.56	95% 置信区间:	1.175 到 14.51	95% 置信区间:	-7.803 到 5.132	95% 置信区间:	-31.74 到 -17.53
	R squared (eta squared)	0.9446	R squared (eta squared)	0.2942	R squared (eta squared)	0.2161	R squared (eta squared)	0.9338	R squared (eta squared)	0.7746	R squared (eta squared)	0.4072	R squared (eta squared)	0.02073	R squared (eta squared)	0.8565
	F 测试比较差异		F 测试比较差异		F 测试比较差异		F 测试比较差异		F 测试比较差异		F 测试比较差异		F 测试比较差异		F 测试比较差异
	F, DFn, Dfd	2.378, 5, 5	F, DFn, Dfd	2.837, 5, 5	F, DFn, Dfd	4.553, 5, 5	F, DFn, Dfd	6.094, 5, 5	F, DFn, Dfd	4.541, 5, 5	F, DFn, Dfd	2.562, 5, 5	F, DFn, Dfd	1.331, 5, 5	F, DFn, Dfd	1.725, 5, 5
	P 值︰	0.3635	P 值︰	0.2772	P 值︰	0.1217	P 值︰	0.0691	P 值︰	0.1223	P 值︰	0.3249	P 值︰	0.7614	P 值︰	0.5641
	P 值摘要	ns	P 值摘要	ns	P 值摘要	ns	P 值摘要	ns	P 值摘要	ns	P 值摘要	ns	P 值摘要	ns	P 值摘要	ns
	显著不同 (P < 0.05)?	否	显著不同 (P < 0.05)?	否	显著不同 (P < 0.05)?	否	显著不同 (P < 0.05)?	否	显著不同 (P < 0.05)?	否	显著不同 (P < 0.05)?	否	显著不同 (P < 0.05)?	否	显著不同 (P < 0.05)?	否
	数据分析...		数据分析...		数据分析...		数据分析...		数据分析...		数据分析...		数据分析...		数据分析...
	样本大小:, column A	6	样本大小:, column A	6	样本大小:, column A	6	样本大小:, column A	6	样本大小:, column E	6	样本大小:, column E	6	样本大小:, column C	6	样本大小:, column G	6
	样本大小:, column E	6	样本大小:, column B	6	样本大小:, column C	6	样本大小:, column G	6	样本大小:, column F	6	样本大小:, column G	6	样本大小:, column D	6	样本大小:, column H	6
	表进行了分析︰	数据 1		表进行了分析︰	数据 1		表进行了分析︰	数据 1		表进行了分析︰	数据 1		表进行了分析︰	数据 1		表进行了分析︰	数据 1		表进行了分析︰	数据 1		表进行了分析︰	数据 1
	列 H	TG+CAE+RR		列 C	TG		列 G	TG+CAE		列 B	TYP		列 F	CAE+TYP		列 G	TG+CAE		列 D	TG+TYP		列 H	TG+CAE+TYP
	vs.	vs.		vs.	vs.		vs.	vs.		vs.	vs.		vs.	vs.		vs.	vs.		vs.	vs.		vs.	vs.
	列 G	TG+CAE		列 A	C		列 A	C		列 A	C		列 E	CAE		列 E	CAE		列 C	TG		列 G	TG+CAE
	配对的 t 检验			配对的 t 检验			配对的 t 检验			配对的 t 检验			配对的 t 检验			配对的 t 检验			配对的 t 检验			配对的 t 检验
	P 值︰	<0.0001		P 值︰	0.3977		P 值︰	<0.0001		P 值︰	0.913		P 值︰	0.0013		P 值︰	0.0317		P 值︰	0.1749		P 值︰	0.0191
	P 值摘要	****		P 值摘要	ns		P 值摘要	****		P 值摘要	ns		P 值摘要	**		P 值摘要	*		P 值摘要	ns		P 值摘要	*
	显著不同 (P < 0.05)?	是		显著不同 (P < 0.05)?	否		显著不同 (P < 0.05)?	是		显著不同 (P < 0.05)?	否		显著不同 (P < 0.05)?	是		显著不同 (P < 0.05)?	是		显著不同 (P < 0.05)?	否		显著不同 (P < 0.05)?	是
	One- or two-tailed P value?	双尾		One- or two-tailed P value?	双尾		One- or two-tailed P value?	双尾		One- or two-tailed P value?	双尾		One- or two-tailed P value?	双尾		One- or two-tailed P value?	双尾		One- or two-tailed P value?	双尾		One- or two-tailed P value?	双尾
	t, df	t=7.725, df=10		t, df	t=0.8935, df=8		t, df	t=7.345, df=8		t, df	t=0.1127, df=8		t, df	t=4.850, df=8		t, df	t=2.597, df=8		t, df	t=1.488, df=8		t, df	t=2.925, df=8
	差异有多大？			差异有多大？			差异有多大？			差异有多大？			差异有多大？			差异有多大？			差异有多大？			差异有多大？
	Mean of column G	74.33		Mean of column A	41.28		Mean of column A	41.28		Mean of column A	41.28		Mean of column E	55.57		Mean of column E	55.57		Mean of column C	38.18		Mean of column G	64.99
	Mean of column H	49.69		Mean of column C	38.18		Mean of column G	64.99		Mean of column B	40.96		Mean of column F	70.08		Mean of column G	64.99		Mean of column D	43.49		Mean of column H	75.29
	Difference between means (H - G) ± SEM	-24.64 ± 3.189		Difference between means (C - A) ± SEM	-3.106 ± 3.476		Difference between means (G - A) ± SEM	23.71 ± 3.228		Difference between means (B - A) ± SEM	-0.3245 ± 2.879		Difference between means (F - E) ± SEM	14.51 ± 2.991		Difference between means (G - E) ± SEM	9.423 ± 3.628		Difference between means (D - C) ± SEM	5.310 ± 3.567		Difference between means (H - G) ± SEM	10.29 ± 3.519
	95% 置信区间:	-31.74 到 -17.53		95% 置信区间:	-11.12 到 4.910		95% 置信区间:	16.27 到 31.15		95% 置信区间:	-6.963 到 6.314		95% 置信区间:	7.610 到 21.40		95% 置信区间:	1.057 到 17.79		95% 置信区间:	-2.916 到 13.54		95% 置信区间:	2.180 到 18.41
	R squared (eta squared)	0.8565		R squared (eta squared)	0.09073		R squared (eta squared)	0.8709		R squared (eta squared)	0.001585		R squared (eta squared)	0.7462		R squared (eta squared)	0.4575		R squared (eta squared)	0.2169		R squared (eta squared)	0.5169
	F 测试比较差异			F 测试比较差异			F 测试比较差异			F 测试比较差异			F 测试比较差异			F 测试比较差异			F 测试比较差异			F 测试比较差异
	F, DFn, Dfd	1.725, 5, 5		F, DFn, Dfd	1.707, 4, 4		F, DFn, Dfd	1.335, 4, 4		F, DFn, Dfd	1.167, 4, 4		F, DFn, Dfd	4.135, 4, 4		F, DFn, Dfd	1.209, 4, 4		F, DFn, Dfd	1.493, 4, 4		F, DFn, Dfd	1.079, 4, 4
	P 值︰	0.5641		P 值︰	0.617		P 值︰	0.7864		P 值︰	0.8848		P 值︰	0.198		P 值︰	0.8584		P 值︰	0.7075		P 值︰	0.9431
	P 值摘要	ns		P 值摘要	ns		P 值摘要	ns		P 值摘要	ns		P 值摘要	ns		P 值摘要	ns		P 值摘要	ns		P 值摘要	ns
	显著不同 (P < 0.05)?	否		显著不同 (P < 0.05)?	否		显著不同 (P < 0.05)?	否		显著不同 (P < 0.05)?	否		显著不同 (P < 0.05)?	否		显著不同 (P < 0.05)?	否		显著不同 (P < 0.05)?	否		显著不同 (P < 0.05)?	否
	数据分析...			数据分析...			数据分析...			数据分析...			数据分析...			数据分析...			数据分析...			数据分析...
	样本大小:, column G	6		样本大小:, column A	5		样本大小:, column A	5		样本大小:, column A	5		样本大小:, column E	5		样本大小:, column E	5		样本大小:, column C	5		样本大小:, column G	5
	样本大小:, column H	6		样本大小:, column C	5		样本大小:, column G	5		样本大小:, column B	5		样本大小:, column F	5		样本大小:, column G	5		样本大小:, column D	5		样本大小:, column H	5
Monolayer cell permeability
	表进行了分析︰	数据 1	表进行了分析︰	数据 1	表进行了分析︰	数据 1	表进行了分析︰	数据 1		表进行了分析︰	数据 1	表进行了分析︰	数据 1	表进行了分析︰	数据 1	表进行了分析︰	数据 1
	列 E	CAE	列 B	R	列 C	TG	列 G	TGCAE		列 F	CAER	列 G	TGCAE	列 D	TGR	列 H	TGCAER
	vs.	vs.	vs.	vs.	vs.	vs.	vs.	vs.		vs.	vs.	vs.	vs.	vs.	vs.	vs.	vs.
	列 A	C	列 A	C	列 A	C	列 A	C		列 E	CAE	列 E	CAE	列 C	TG	列 G	TGCAE
	配对的 t 检验		配对的 t 检验		配对的 t 检验		配对的 t 检验			配对的 t 检验		配对的 t 检验		配对的 t 检验		配对的 t 检验
	P 值︰	0.0303	P 值︰	0.8627	P 值︰	0.4405	P 值︰	0.0077		P 值︰	0.015	P 值︰	0.0329	P 值︰	0.3973	P 值︰	0.0472
	P 值摘要	*	P 值摘要	ns	P 值摘要	ns	P 值摘要	**		P 值摘要	*	P 值摘要	*	P 值摘要	ns	P 值摘要	*
	显著不同 (P < 0.05)?	是	显著不同 (P < 0.05)?	否	显著不同 (P < 0.05)?	否	显著不同 (P < 0.05)?	是		显著不同 (P < 0.05)?	是	显著不同 (P < 0.05)?	是	显著不同 (P < 0.05)?	否	显著不同 (P < 0.05)?	是
	One- or two-tailed P value?	双尾	One- or two-tailed P value?	双尾	One- or two-tailed P value?	双尾	One- or two-tailed P value?	双尾		One- or two-tailed P value?	双尾	One- or two-tailed P value?	双尾	One- or two-tailed P value?	双尾	One- or two-tailed P value?	双尾
	t, df	t=3.287, df=4	t, df	t=0.1844, df=4	t, df	t=0.8555, df=4	t, df	t=4.958, df=4		t, df	t=4.085, df=4	t, df	t=3.199, df=4	t, df	t=0.9469, df=4	t, df	t=2.833, df=4
	差异有多大？		差异有多大？		差异有多大？		差异有多大？			差异有多大？		差异有多大？		差异有多大？		差异有多大？
	Mean of column A	585	Mean of column A	585	Mean of column A	585	Mean of column A	585		Mean of column E	948	Mean of column E	948	Mean of column C	700.1	Mean of column G	1239
	Mean of column E	948	Mean of column B	563.5	Mean of column C	700.1	Mean of column G	1239		Mean of column F	583.9	Mean of column G	1239	Mean of column D	608.3	Mean of column H	786.3
	Difference between means (E - A) ± SEM	363.0 ± 110.5	Difference between means (B - A) ± SEM	-21.43 ± 116.2	Difference between means (C - A) ± SEM	115.1 ± 134.6	Difference between means (G - A) ± SEM	654.3 ± 132.0		Difference between means (F - E) ± SEM	-364.1 ± 89.14	Difference between means (G - E) ± SEM	291.3 ± 91.05	Difference between means (D - C) ± SEM	-91.77 ± 96.91	Difference between means (H - G) ± SEM	-453.0 ± 159.9
	95% 置信区间:	56.34 到 669.7	95% 置信区间:	-344.1 到 301.2	95% 置信区间:	-258.5 到 488.8	95% 置信区间:	287.9 到 1021		95% 置信区间:	-611.6 到 -116.6	95% 置信区间:	38.47 到 544.1	95% 置信区间:	-360.8 到 177.3	95% 置信区间:	-896.9 到 -8.998
	R squared (eta squared)	0.7298	R squared (eta squared)	0.008431	R squared (eta squared)	0.1547	R squared (eta squared)	0.86		R squared (eta squared)	0.8066	R squared (eta squared)	0.719	R squared (eta squared)	0.1831	R squared (eta squared)	0.6673
	F 测试比较差异		F 测试比较差异		F 测试比较差异		F 测试比较差异			F 测试比较差异		F 测试比较差异		F 测试比较差异		F 测试比较差异
	F, DFn, Dfd	6.935, 2, 2	F, DFn, Dfd	3.751, 2, 2	F, DFn, Dfd	1.432, 2, 2	F, DFn, Dfd	1.579, 2, 2		F, DFn, Dfd	4.167, 2, 2	F, DFn, Dfd	4.391, 2, 2	F, DFn, Dfd	3.827, 2, 2	F, DFn, Dfd	2.787, 2, 2
	P 值︰	0.252	P 值︰	0.421	P 值︰	0.8223	P 值︰	0.7754		P 值︰	0.3871	P 值︰	0.371	P 值︰	0.4143	P 值︰	0.5282
	P 值摘要	ns	P 值摘要	ns	P 值摘要	ns	P 值摘要	ns		P 值摘要	ns	P 值摘要	ns	P 值摘要	ns	P 值摘要	ns
	显著不同 (P < 0.05)?	否	显著不同 (P < 0.05)?	否	显著不同 (P < 0.05)?	否	显著不同 (P < 0.05)?	否		显著不同 (P < 0.05)?	否	显著不同 (P < 0.05)?	否	显著不同 (P < 0.05)?	否	显著不同 (P < 0.05)?	否
	数据分析...		数据分析...		数据分析...		数据分析...			数据分析...		数据分析...		数据分析...		数据分析...
	样本大小:, column A	3	样本大小:, column A	3	样本大小:, column A	3	样本大小:, column A	3		样本大小:, column E	3	样本大小:, column E	3	样本大小:, column C	3	样本大小:, column G	3
	样本大小:, column E	3	样本大小:, column B	3	样本大小:, column C	3	样本大小:, column G	3		样本大小:, column F	3	样本大小:, column G	3	样本大小:, column D	3	样本大小:, column H	3
	表进行了分析︰	数据 1	表进行了分析︰	数据 1		表进行了分析︰	数据 1	表进行了分析︰	数据 1	表进行了分析︰	数据 1	表进行了分析︰	数据 1	表进行了分析︰	数据 1	表进行了分析︰	数据 1
	列 E	CAE	列 C	TG		列 G	TG+CAE	列 B	TYP	列 F	CAE+TYP	列 G	TG+CAE	列 D	TG+TYP	列 H	TG+CAE+TYP
	vs.	vs.	vs.	vs.		vs.	vs.	vs.	vs.	vs.	vs.	vs.	vs.	vs.	vs.	vs.	vs.
	列 A	C	列 A	C		列 A	C	列 A	C	列 E	CAE	列 E	CAE	列 C	TG	列 G	TG+CAE
	配对的 t 检验		配对的 t 检验			配对的 t 检验		配对的 t 检验		配对的 t 检验		配对的 t 检验		配对的 t 检验		配对的 t 检验
	P 值︰	0.0212	P 值︰	0.4405		P 值︰	0.0057	P 值︰	0.8499	P 值︰	0.0402	P 值︰	0.019	P 值︰	0.852	P 值︰	0.0411
	P 值摘要	*	P 值摘要	ns		P 值摘要	**	P 值摘要	ns	P 值摘要	*	P 值摘要	*	P 值摘要	ns	P 值摘要	*
	显著不同 (P < 0.05)?	是	显著不同 (P < 0.05)?	否		显著不同 (P < 0.05)?	是	显著不同 (P < 0.05)?	否	显著不同 (P < 0.05)?	是	显著不同 (P < 0.05)?	是	显著不同 (P < 0.05)?	否	显著不同 (P < 0.05)?	是
	One- or two-tailed P value?	双尾	One- or two-tailed P value?	双尾		One- or two-tailed P value?	双尾	One- or two-tailed P value?	双尾	One- or two-tailed P value?	双尾	One- or two-tailed P value?	双尾	One- or two-tailed P value?	双尾	One- or two-tailed P value?	双尾
	t, df	t=3.680, df=4	t, df	t=0.8555, df=4		t, df	t=5.402, df=4	t, df	t=0.2019, df=4	t, df	t=2.992, df=4	t, df	t=3.805, df=4	t, df	t=0.1990, df=4	t, df	t=2.972, df=4
	差异有多大？		差异有多大？			差异有多大？		差异有多大？		差异有多大？		差异有多大？		差异有多大？		差异有多大？
	Mean of column A	585	Mean of column A	585		Mean of column A	585	Mean of column A	585	Mean of column E	981.3	Mean of column E	981.3	Mean of column C	700.1	Mean of column G	1206
	Mean of column E	981.3	Mean of column C	700.1		Mean of column G	1206	Mean of column B	613.5	Mean of column F	1140	Mean of column G	1206	Mean of column D	725.7	Mean of column H	1443
	Difference between means (E - A) ± SEM	396.4 ± 107.7	Difference between means (C - A) ± SEM	115.1 ± 134.6		Difference between means (G - A) ± SEM	621.0 ± 114.9	Difference between means (B - A) ± SEM	28.57 ± 141.5	Difference between means (F - E) ± SEM	158.3 ± 52.91	Difference between means (G - E) ± SEM	224.6 ± 59.03	Difference between means (D - C) ± SEM	25.63 ± 128.8	Difference between means (H - G) ± SEM	237.4 ± 79.88
	95% 置信区间:	97.34 到 695.4	95% 置信区间:	-258.5 到 488.8		95% 置信区间:	301.8 到 940.1	95% 置信区间:	-364.3 到 421.4	95% 置信区间:	11.42 到 305.2	95% 置信区间:	60.70 到 388.5	95% 置信区间:	-332.0 到 383.3	95% 置信区间:	15.64 到 459.2
	R squared (eta squared)	0.772	R squared (eta squared)	0.1547		R squared (eta squared)	0.8795	R squared (eta squared)	0.01009	R squared (eta squared)	0.6912	R squared (eta squared)	0.7835	R squared (eta squared)	0.009804	R squared (eta squared)	0.6883
	F 测试比较差异		F 测试比较差异			F 测试比较差异		F 测试比较差异		F 测试比较差异		F 测试比较差异		F 测试比较差异		F 测试比较差异
	F, DFn, Dfd	11.40, 2, 2	F, DFn, Dfd	1.432, 2, 2		F, DFn, Dfd	4.183, 2, 2	F, DFn, Dfd	1.140, 2, 2	F, DFn, Dfd	1.993, 2, 2	F, DFn, Dfd	2.725, 2, 2	F, DFn, Dfd	1.228, 2, 2	F, DFn, Dfd	1.503, 2, 2
	P 值︰	0.1613	P 值︰	0.8223		P 值︰	0.3859	P 值︰	0.9347	P 值︰	0.6682	P 值︰	0.5369	P 值︰	0.8976	P 值︰	0.799
	P 值摘要	ns	P 值摘要	ns		P 值摘要	ns	P 值摘要	ns	P 值摘要	ns	P 值摘要	ns	P 值摘要	ns	P 值摘要	ns
	显著不同 (P < 0.05)?	否	显著不同 (P < 0.05)?	否		显著不同 (P < 0.05)?	否	显著不同 (P < 0.05)?	否	显著不同 (P < 0.05)?	否	显著不同 (P < 0.05)?	否	显著不同 (P < 0.05)?	否	显著不同 (P < 0.05)?	否
	数据分析...		数据分析...			数据分析...		数据分析...		数据分析...		数据分析...		数据分析...		数据分析...
	样本大小:, column A	3	样本大小:, column A	3		样本大小:, column A	3	样本大小:, column A	3	样本大小:, column E	3	样本大小:, column E	3	样本大小:, column C	3	样本大小:, column G	3
	样本大小:, column E	3	样本大小:, column C	3		样本大小:, column G	3	样本大小:, column B	3	样本大小:, column F	3	样本大小:, column G	3	样本大小:, column D	3	样本大小:, column H	3
Mitochondrial calcium
		Area	Mean	Min	Max	IntDen	%Area	RawIntDen	MinThr	MaxThr
	1	25938	75.33	33	255	1953898	2.111	1953898	33	255
	2	23416	103.392	46	255	2421036	1.906	2421036	46	255
	3	10059	130.405	46	255	1311740	0.819	1311740	46	255
	4	31950	89.815	43	255	2869591	2.6	2869591	43	255
	5	55136	79.321	45	255	4373429	4.487	4373429	45	255
	6	69443	91.743	50	255	6370920	5.651	6370920	50	255
	7	37404	95.536	53	255	3573427	3.044	3573427	53	255
	8	121963	83.999	50	255	10244730	9.925	10244730	49	255
	Control	TYP	TG	TG+TYP	CAE	CAE+TYP	TG+CAE	TG+CAE+TYP
	71.027	81.922	73.679	73.713	92.504	138.224	130.892	154.082
	73.538	51.901	68.825	87.301	108.213	129.702	127.545	120.893
	63.194	52.104	64.535	80.557	89.015	112.836	102.375	129.812
	74.76	79.169	55.336	83.284	107.504	138.041	133.494	123.737
	76.499	71.102	50.271	75.046	104.945	119.612	103.437	126.314
	72.072	73.263	58.754	76.913	80.412	112.27	109.175	157.184
	50.348	51.103	73.769	77.65	113.875	103.237	110.553	150.107
	52.884	74.563	74.852	61.407	92.122	104.242	117.565	152.209
	55.621	78.243	56.052	65.882	91.126	124.406	115.561	150.189
	65.046	80.205	68.114	79.143	105.62	137.366	110.432	151.765
	67.607	64.713	67.047	82.467	108.213	122.21	133.729	146.266
	51.824	59.917	61.199	53.371	114.794	112.323	113.699	155.579
	55.772	86.145	64.922	78.147	97.159	130.276	135.415	143.507
	76.363	71.409	74.159	66.875	94.751	114.794	123.583	153.113
	53.581	76.561	58.53	87.963	98.134	105.244	134.387	133.676
	表进行了分析︰	数据 1	表进行了分析︰	数据 1	表进行了分析︰	数据 1	表进行了分析︰	数据 1	表进行了分析︰	数据 1	表进行了分析︰	数据 1	表进行了分析︰	数据 1	表进行了分析︰	数据 1	表进行了分析︰	数据 1
	列 E	CAE	列 B	RR	列 C	TG	列 G	TG+CAE	列 F	CAE+RR	列 G	TG+CAE	列 G	TG+CAE	列 D	TG+RR	列 H	TG+CAE+RR
	vs.	vs.	vs.	vs.	vs.	vs.	vs.	vs.	vs.	vs.	vs.	vs.	vs.	vs.	vs.	vs.	vs.	vs.
	列 A	C	列 A	C	列 A	C	列 A	C	列 E	CAE	列 E	CAE	列 C	TG	列 C	TG	列 G	TG+CAE
	配对的 t 检验		配对的 t 检验		配对的 t 检验		配对的 t 检验		配对的 t 检验		配对的 t 检验		配对的 t 检验		配对的 t 检验		配对的 t 检验
	P 值︰	<0.0001	P 值︰	0.0865	P 值︰	0.7501	P 值︰	<0.0001	P 值︰	<0.0001	P 值︰	0.0084	P 值︰	<0.0001	P 值︰	0.0697	P 值︰	<0.0001
	P 值摘要	****	P 值摘要	ns	P 值摘要	ns	P 值摘要	****	P 值摘要	****	P 值摘要	**	P 值摘要	****	P 值摘要	ns	P 值摘要	****
	显著不同 (P < 0.05)?	是	显著不同 (P < 0.05)?	否	显著不同 (P < 0.05)?	否	显著不同 (P < 0.05)?	是	显著不同 (P < 0.05)?	是	显著不同 (P < 0.05)?	是	显著不同 (P < 0.05)?	是	显著不同 (P < 0.05)?	否	显著不同 (P < 0.05)?	是
	One- or two-tailed P value?	双尾	One- or two-tailed P value?	双尾	One- or two-tailed P value?	双尾	One- or two-tailed P value?	双尾	One- or two-tailed P value?	双尾	One- or two-tailed P value?	双尾	One- or two-tailed P value?	双尾	One- or two-tailed P value?	双尾	One- or two-tailed P value?	双尾
	t, df	t=15.49, df=8	t, df	t=1.954, df=8	t, df	t=0.3297, df=8	t, df	t=16.25, df=8	t, df	t=9.870, df=8	t, df	t=3.473, df=8	t, df	t=15.64, df=8	t, df	t=2.093, df=8	t, df	t=12.03, df=8
	差异有多大？		差异有多大？		差异有多大？		差异有多大？		差异有多大？		差异有多大？		差异有多大？		差异有多大？		差异有多大？
	Mean of column A	55.85	Mean of column A	55.85	Mean of column A	55.85	Mean of column A	55.85	Mean of column E	133.3	Mean of column E	133.3	Mean of column C	54.74	Mean of column C	54.74	Mean of column G	159.9
	Mean of column E	133.3	Mean of column B	50.87	Mean of column C	54.74	Mean of column G	159.9	Mean of column F	66.51	Mean of column G	159.9	Mean of column G	159.9	Mean of column D	48.31	Mean of column H	69.65
	Difference between means (E - A) ± SEM	77.47 ± 5.000	Difference between means (B - A) ± SEM	-4.982 ± 2.550	Difference between means (C - A) ± SEM	-1.117 ± 3.389	Difference between means (G - A) ± SEM	104.1 ± 6.404	Difference between means (F - E) ± SEM	-66.82 ± 6.770	Difference between means (G - E) ± SEM	26.62 ± 7.664	Difference between means (G - C) ± SEM	105.2 ± 6.725	Difference between means (D - C) ± SEM	-6.428 ± 3.071	Difference between means (H - G) ± SEM	-90.29 ± 7.503
	95% 置信区间:	65.94 到 89.00	95% 置信区间:	-10.86 到 0.8976	95% 置信区间:	-8.933 到 6.698	95% 置信区间:	89.32 到 118.9	95% 置信区间:	-82.43 到 -51.21	95% 置信区间:	8.943 到 44.29	95% 置信区间:	89.70 到 120.7	95% 置信区间:	-13.51 到 0.6543	95% 置信区间:	-107.6 到 -72.99
	R squared (eta squared)	0.9677	R squared (eta squared)	0.3231	R squared (eta squared)	0.0134	R squared (eta squared)	0.9706	R squared (eta squared)	0.9241	R squared (eta squared)	0.6012	R squared (eta squared)	0.9683	R squared (eta squared)	0.3538	R squared (eta squared)	0.9476
	F 测试比较差异		F 测试比较差异		F 测试比较差异		F 测试比较差异		F 测试比较差异		F 测试比较差异		F 测试比较差异		F 测试比较差异		F 测试比较差异
	F, DFn, Dfd	5.872, 4, 4	F, DFn, Dfd	1.271, 4, 4	F, DFn, Dfd	2.157, 4, 4	F, DFn, Dfd	10.27, 4, 4	F, DFn, Dfd	1.145, 4, 4	F, DFn, Dfd	1.749, 4, 4	F, DFn, Dfd	4.762, 4, 4	F, DFn, Dfd	4.960, 4, 4	F, DFn, Dfd	1.975, 4, 4
	P 值︰	0.1147	P 值︰	0.8218	P 值︰	0.4748	P 值︰	0.0444	P 值︰	0.8987	P 值︰	0.6013	P 值︰	0.1598	P 值︰	0.15	P 值︰	0.5259
	P 值摘要	ns	P 值摘要	ns	P 值摘要	ns	P 值摘要	*	P 值摘要	ns	P 值摘要	ns	P 值摘要	ns	P 值摘要	ns	P 值摘要	ns
	显著不同 (P < 0.05)?	否	显著不同 (P < 0.05)?	否	显著不同 (P < 0.05)?	否	显著不同 (P < 0.05)?	是	显著不同 (P < 0.05)?	否	显著不同 (P < 0.05)?	否	显著不同 (P < 0.05)?	否	显著不同 (P < 0.05)?	否	显著不同 (P < 0.05)?	否
	数据分析...		数据分析...		数据分析...		数据分析...		数据分析...		数据分析...		数据分析...		数据分析...		数据分析...
	样本大小:, column A	5	样本大小:, column A	5	样本大小:, column A	5	样本大小:, column A	5	样本大小:, column E	5	样本大小:, column E	5	样本大小:, column C	5	样本大小:, column C	5	样本大小:, column G	5
	样本大小:, column E	5	样本大小:, column B	5	样本大小:, column C	5	样本大小:, column G	5	样本大小:, column F	5	样本大小:, column G	5	样本大小:, column G	5	样本大小:, column D	5	样本大小:, column H	5
TG and Serum amylase
	A1	AMY	503.804	U/L		C1	0.986	mmol/L		AMY						TG
	A2	AMY	549.052	U/L		C2	1.220	mmol/L			Control	HTG	AP	HTGP			Control	HTG	AP	HTGP
	A3	AMY	579.227	U/L		C3	1.349	mmol/L			556.324	495.176	503.804	879.402			0.986	2.414	1.123	2.162
	A4	AMY	351.57	U/L		C4	1.435	mmol/L			467.503	512.368	549.052	919.818			1.220	2.626	1.255	2.61
	A5	AMY	478.034	U/L		C5	1.556	mmol/L			411.420	410.212	579.227	1319.56			1.349	2.848	1.432	2.832
	C1	AMY	556.324	U/L		AP1	1.123	mmol/L			397.629	379.521	351.57	987.946			1.435	3.18	1.520	3.008
	C2	AMY	467.503	U/L		AP2	1.255	mmol/L			431.92	378.662	478.034	1128.48			1.556	3.608	1.598	3.324
	C3	AMY	411.420	U/L		AP3	1.432	mmol/L
	C4	AMY	397.629	U/L		AP4	1.520	mmol/L
	C5	AMY	431.92	U/L		AP5	1.598	mmol/L
	TG1	AMY	495.176	U/L		TG1	2.414	mmol/L
	TG2	AMY	512.368	U/L		TG2	2.626	mmol/L
	TG3	AMY	410.212	U/L		TG3	2.848	mmol/L
	TG4	AMY	379.521	U/L		TG4	3.18	mmol/L
	TG5	AMY	378.662	U/L		TG5	3.608	mmol/L
	H1	AMY	879.402	U/L		HTGP1	2.162	mmol/L
	H2	AMY	919.818	U/L		HTGP2	2.61	mmol/L
	H3	AMY	1319.56	U/L		THGP3	2.832	mmol/L
	H4	AMY	987.946	U/L		HTGP4	3.008	mmol/L
	H5	AMY	1128.48	U/L		HTGP5	3.324	mmol/L
	表进行了分析︰	数据 1	表进行了分析︰	数据 1	表进行了分析︰	数据 1	表进行了分析︰	数据 1	表进行了分析︰	数据 1	表进行了分析︰	数据 1
	列 D	HTGP	列 C	AP	列 B	HTG	列 D	HTGP	列 C	AP	列 D	HTGP
	vs.	vs.	vs.	vs.	vs.	vs.	vs.	vs.	vs.	vs.	vs.	vs.
	列 C	AP	列 A	Control	列 A	Control	列 A	Control	列 B	HTG	列 B	HTG
	配对的 t 检验		配对的 t 检验		配对的 t 检验		配对的 t 检验		配对的 t 检验		配对的 t 检验
	P 值︰	0.0003	P 值︰	0.4403	P 值︰	0.6715	P 值︰	0.0001	P 值︰	0.2741	P 值︰	<0.0001
	P 值摘要	***	P 值摘要	ns	P 值摘要	ns	P 值摘要	***	P 值摘要	ns	P 值摘要	****
	显著不同 (P < 0.05)?	是	显著不同 (P < 0.05)?	否	显著不同 (P < 0.05)?	否	显著不同 (P < 0.05)?	是	显著不同 (P < 0.05)?	否	显著不同 (P < 0.05)?	是
	One- or two-tailed P value?	双尾	One- or two-tailed P value?	双尾	One- or two-tailed P value?	双尾	One- or two-tailed P value?	双尾	One- or two-tailed P value?	双尾	One- or two-tailed P value?	双尾
	t, df	t=6.210, df=8	t, df	t=0.8119, df=8	t, df	t=0.4402, df=8	t, df	t=6.982, df=8	t, df	t=1.174, df=8	t, df	t=7.182, df=8
	差异有多大？		差异有多大？		差异有多大？		差异有多大？		差异有多大？		差异有多大？
	Mean of column C	492.3	Mean of column A	453	Mean of column A	453	Mean of column A	453	Mean of column B	435.2	Mean of column B	435.2
	Mean of column D	1047	Mean of column C	492.3	Mean of column B	435.2	Mean of column D	1047	Mean of column C	492.3	Mean of column D	1047
	Difference between means (D - C) ± SEM	554.7 ± 89.33	Difference between means (C - A) ± SEM	39.38 ± 48.50	Difference between means (B - A) ± SEM	-17.77 ± 40.37	Difference between means (D - A) ± SEM	594.1 ± 85.09	Difference between means (C - B) ± SEM	57.15 ± 48.68	Difference between means (D - B) ± SEM	611.9 ± 85.19
	95% 置信区间:	348.7 到 760.7	95% 置信区间:	-72.46 到 151.2	95% 置信区间:	-110.9 到 75.33	95% 置信区间:	397.9 到 790.3	95% 置信区间:	-55.10 到 169.4	95% 置信区间:	415.4 到 808.3
	R squared (eta squared)	0.8282	R squared (eta squared)	0.07613	R squared (eta squared)	0.02365	R squared (eta squared)	0.859	R squared (eta squared)	0.147	R squared (eta squared)	0.8657
	F 测试比较差异		F 测试比较差异		F 测试比较差异		F 测试比较差异		F 测试比较差异		F 测试比较差异
	F, DFn, Dfd	4.162, 4, 4	F, DFn, Dfd	1.917, 4, 4	F, DFn, Dfd	1.022, 4, 4	F, DFn, Dfd	7.980, 4, 4	F, DFn, Dfd	1.877, 4, 4	F, DFn, Dfd	7.811, 4, 4
	P 值︰	0.1961	P 值︰	0.5439	P 值︰	0.984	P 值︰	0.0689	P 值︰	0.557	P 值︰	0.0714
	P 值摘要	ns	P 值摘要	ns	P 值摘要	ns	P 值摘要	ns	P 值摘要	ns	P 值摘要	ns
	显著不同 (P < 0.05)?	否	显著不同 (P < 0.05)?	否	显著不同 (P < 0.05)?	否	显著不同 (P < 0.05)?	否	显著不同 (P < 0.05)?	否	显著不同 (P < 0.05)?	否
	数据分析...		数据分析...		数据分析...		数据分析...		数据分析...		数据分析...
	样本大小:, column C	5	样本大小:, column A	5	样本大小:, column A	5	样本大小:, column A	5	样本大小:, column B	5	样本大小:, column B	5
	样本大小:, column D	5	样本大小:, column C	5	样本大小:, column B	5	样本大小:, column D	5	样本大小:, column C	5	样本大小:, column D	5
	表进行了分析︰	数据 1	表进行了分析︰	数据 1	表进行了分析︰	数据 1	表进行了分析︰	数据 1		表进行了分析︰	数据 1	表进行了分析︰	数据 1
	列 D	HTGP	列 C	AP	列 B	HTG	列 D	HTGP		列 C	AP	列 D	HTGP
	vs.	vs.	vs.	vs.	vs.	vs.	vs.	vs.		vs.	vs.	vs.	vs.
	列 C	AP	列 A	Control	列 A	Control	列 A	Control		列 B	HTG	列 B	HTG
	配对的 t 检验		配对的 t 检验		配对的 t 检验		配对的 t 检验			配对的 t 检验		配对的 t 检验
	P 值︰	0.0002	P 值︰	0.5752	P 值︰	0.0001	P 值︰	0.0001		P 值︰	0.0001	P 值︰	0.6202
	P 值摘要	***	P 值摘要	ns	P 值摘要	***	P 值摘要	***		P 值摘要	***	P 值摘要	ns
	显著不同 (P < 0.05)?	是	显著不同 (P < 0.05)?	否	显著不同 (P < 0.05)?	是	显著不同 (P < 0.05)?	是		显著不同 (P < 0.05)?	是	显著不同 (P < 0.05)?	否
	One- or two-tailed P value?	双尾	One- or two-tailed P value?	双尾	One- or two-tailed P value?	双尾	One- or two-tailed P value?	双尾		One- or two-tailed P value?	双尾	One- or two-tailed P value?	双尾
	t, df	t=6.562, df=8	t, df	t=0.5842, df=8	t, df	t=7.003, df=8	t, df	t=6.775, df=8		t, df	t=6.799, df=8	t, df	t=0.5155, df=8
	差异有多大？		差异有多大？		差异有多大？		差异有多大？			差异有多大？		差异有多大？
	Mean of column C	1.386	Mean of column A	1.309	Mean of column A	1.309	Mean of column A	1.309		Mean of column B	2.935	Mean of column B	2.935
	Mean of column D	2.787	Mean of column C	1.386	Mean of column B	2.935	Mean of column D	2.787		Mean of column C	1.386	Mean of column D	2.787
	Difference between means (D - C) ± SEM	1.402 ± 0.2136	Difference between means (C - A) ± SEM	0.07640 ± 0.1308	Difference between means (B - A) ± SEM	1.626 ± 0.2322	Difference between means (D - A) ± SEM	1.478 ± 0.2182		Difference between means (C - B) ± SEM	-1.550 ± 0.2279	Difference between means (D - B) ± SEM	-0.1480 ± 0.2871
	95% 置信区间:	0.9090 到 1.894	95% 置信区间:	-0.2252 到 0.3780	95% 置信区间:	1.091 到 2.161	95% 置信区间:	0.9749 到 1.981		95% 置信区间:	-2.075 到 -1.024	95% 置信区间:	-0.8101 到 0.5141
	R squared (eta squared)	0.8433	R squared (eta squared)	0.04091	R squared (eta squared)	0.8598	R squared (eta squared)	0.8516		R squared (eta squared)	0.8525	R squared (eta squared)	0.03215
	F 测试比较差异		F 测试比较差异		F 测试比较差异		F 测试比较差异			F 测试比较差异		F 测试比较差异
	F, DFn, Dfd	5.029, 4, 4	F, DFn, Dfd	1.260, 4, 4	F, DFn, Dfd	4.653, 4, 4	F, DFn, Dfd	3.991, 4, 4		F, DFn, Dfd	5.864, 4, 4	F, DFn, Dfd	1.166, 4, 4
	P 值︰	0.1468	P 值︰	0.828	P 值︰	0.1656	P 值︰	0.2087		P 值︰	0.115	P 值︰	0.8854
	P 值摘要	ns	P 值摘要	ns	P 值摘要	ns	P 值摘要	ns		P 值摘要	ns	P 值摘要	ns
	显著不同 (P < 0.05)?	否	显著不同 (P < 0.05)?	否	显著不同 (P < 0.05)?	否	显著不同 (P < 0.05)?	否		显著不同 (P < 0.05)?	否	显著不同 (P < 0.05)?	否
	数据分析...		数据分析...		数据分析...		数据分析...			数据分析...		数据分析...
	样本大小:, column C	5	样本大小:, column A	5	样本大小:, column A	5	样本大小:, column A	5		样本大小:, column B	5	样本大小:, column B	5
	样本大小:, column D	5	样本大小:, column C	5	样本大小:, column B	5	样本大小:, column D	5		样本大小:, column C	5	样本大小:, column D	5
WB
